1 **ISL1 is an essential determinant of structural and functional tonotopic representation of**  
2 **sound**

3  
4  
5 **Authors:** Iva Filova<sup>a, 1</sup>, Kateryna Pysanenko<sup>b,1</sup>, Mitra Tavakoli<sup>a</sup>, Simona Vochyanova<sup>a</sup>,  
6 Martina Dvorakova<sup>a</sup>, Romana Bohuslavova<sup>a</sup>, Ondrej Smolik<sup>a</sup>, Sarka Benesova<sup>c</sup>, Lukas  
7 Valihrach<sup>c</sup>, Ebenezer N. Yamoah<sup>d</sup>, Josef Syka<sup>b,2</sup>, Bernd Fritzsche<sup>e,2</sup>, and Gabriela Pavlinkova<sup>a,2,\*</sup>  
8

9 **Affiliations:**

10 <sup>a</sup>Laboratory of Molecular Pathogenetics, Institute of Biotechnology CAS, 25250 Vestec,  
11 Czechia

12 <sup>b</sup>Department of Auditory Neuroscience, Institute of Experimental Medicine CAS, 142 20  
13 Prague, Czechia

14 <sup>c</sup>Laboratory of Gene Expression, Institute of Biotechnology CAS, 25250 Vestec, Czechia

15 <sup>d</sup>Department of Physiology, School of Medicine, University of Nevada Reno, NV 89557, USA

16 <sup>e</sup>Department of Biology, Department of Otolaryngology, University of Iowa, Iowa City, IA  
17 52242-1324, USA

18 <sup>1</sup>I.F. and K.P. contributed equally to this work.

19 <sup>2</sup>contributed to the conceptualization, evaluation, and writing of this report.

20 \*to whom correspondence should be addressed.

21 Email: [Gabriela.Pavlinkova@ibt.cas.cz](mailto:Gabriela.Pavlinkova@ibt.cas.cz)  
22

23 **Abstract**

24 A cardinal feature of the auditory pathway is frequency selectivity, represented in the form of  
25 a tonotopic map from the cochlea to the cortex. The molecular determinants of the auditory  
26 frequency map are unknown. Here, we discovered that the transcription factor ISL1 regulates  
27 molecular and cellular features of auditory neurons, including the formation of the spiral  
28 ganglion, and peripheral and central processes that shape the tonotopic representation of the  
29 auditory map. We selectively knocked out *Isl1* in auditory neurons using *Neurod1<sup>Cre</sup>* strategies.  
30 In the absence of *Isl1*, spiral ganglion neurons migrate into the central cochlea and beyond, and  
31 the cochlear wiring is profoundly reduced and disrupted. The central axons of *Isl1* mutants lose  
32 their topographic projections and segregation at the cochlear nucleus. Transcriptome analysis  
33 of spiral ganglion neurons shows that *Isl1* regulates neurogenesis, axonogenesis, migration,  
34 neurotransmission-related machinery, and synaptic communication patterns. We show that  
35 peripheral disorganization in the cochlea affects the physiological properties of hearing in the  
36 midbrain and auditory behavior. Surprisingly, auditory processing features are preserved  
37 despite the significant hearing impairment, revealing central auditory pathway resilience and  
38 plasticity in *Isl1* mutant mice. Mutant mice have a reduced acoustic startle reflex, altered  
39 prepulse inhibition, and characteristics of compensatory neural hyperactivity centrally. Our  
40 findings show that ISL1 is one of the obligatory factors required to sculpt auditory structural  
41 and functional tonotopic maps. Still, upon *Isl1* deletion, the ensuing central compensatory  
42 plasticity of the auditory pathway does not suffice to overcome developmentally induced  
43 peripheral dysfunction of the cochlea.

44

45

46 **Keywords**

47 spiral ganglion neurons, inferior colliculus, auditory nuclei, inner ear, brain plasticity, *Isl1*  
48 mutation, auditory maps, auditory behavior

## 49 Introduction

50 Spiral ganglion neurons (SGNs) are bipolar, extending peripheral processes to the hair cells  
51 within the sensory epithelium (the organ of Corti) and central axons towards the cochlear  
52 nucleus (CN) complex, the first auditory nuclei in the brain. Sound-induced vibrations that  
53 reach the cochlea are amplified by the outer hair cells (OHCs) organized in three rows and  
54 innervated by type II SGNs. The inner hair cells (IHCs) receive, transduce, and transmit the  
55 auditory signal to type I SGNs that convey the signal via the vestibulocochlear cranial nerve to  
56 the CN of the brainstem. The auditory neurons are organized within the cochlea in an orderly  
57 fashion according to the frequency with high frequencies at the base and low frequencies at the  
58 apex<sup>1,2</sup>. The cochleotopic or tonotopic pattern is maintained throughout the auditory pathways  
59 in the brain<sup>3</sup>. The central auditory pathway transmits ascending acoustic information from the  
60 CN through the lateral lemniscus complex, the inferior colliculus in the midbrain, the medial  
61 geniculate nucleus of the thalamus to the auditory cortex<sup>4</sup>. The efferent motor neurons consist  
62 of the medial olivocochlear motor neurons, which modulate the cochlear sound amplification  
63 by OHCs, whereas lateral olivocochlear motor neurons innervate afferent sensory neurons and  
64 regulate cochlear nerve excitability<sup>4,5,6</sup>.

65 The cellular and molecular regulation of neuronal migration and the establishment of  
66 tonotopic connections to the hair cells or neurons of the hindbrain's first auditory nuclei, the  
67 CN, are not fully understood. Several transcription factors govern the development of inner ear  
68 neurons, including *NEUROG1*<sup>7</sup>, *NEUROD1*<sup>8</sup>, *GATA3*<sup>9,10</sup>, and *POU4F1*<sup>11</sup>. However, how  
69 the transcriptional networks regulate SGN development and how abnormalities in auditory  
70 neurons and neuronal wiring reshape the auditory central pathways' assembly and acoustic  
71 information processing remain unresolved.

72 The transcription factor *Neurod1* plays a vital role in the differentiation and survival of  
73 inner ear neurons<sup>12,13</sup>. We previously demonstrated that *Isl1*<sup>Cre</sup>-mediated *Neurod1* deletion  
74 (*Neurod1CKO*) resulted in a disorganized cochleotopic projection from SGNs<sup>14</sup>, affecting  
75 acoustic information processing in the central auditory system of adult mice at the  
76 physiological and behavioral levels<sup>15</sup>. During ear development, ISL1 is expressed in the  
77 differentiating neurons and sensory precursors<sup>14,16,17,18,19</sup>. *Isl1* is expressed in all four  
78 populations of SGNs (type Ia, Ib, Ic, and type II) identified by single-cell RNA sequencing<sup>20</sup>.  
79 Studies suggest that ISL1 plays a role in developing neurons and sensory cells, but a direct  
80 evaluation of ISL1 inner ear functions remains unknown. Using *Neurod1*<sup>Cre</sup><sup>21</sup>, we generated a  
81 mutant with a conditional deletion of *Isl1* (*Isl1CKO*), eliminating *Isl1* in neurons without  
82 directly affecting the development of the inner ear sensory epithelium. We first provide genetic  
83 and functional evidence for ISL1's role in establishing spiral ganglion peripheral projection  
84 map and proper central auditory circuitry. Most *Isl1CKO* neurons migrated into the center of  
85 the cochlear modiolus. They extended outside the cartilaginous otic capsule, in contrast, to  
86 control animals with the arrangement of SGNs in parallel to the spiraling cochlear duct.  
87 Additionally, we analyzed a transcriptome of neurons, hearing function, sound information  
88 processing in the inferior colliculus, and auditory behavior of *Isl1CKO* to demonstrate how the  
89 abnormal development of SGNs affects the formation, wiring, and operation of the auditory  
90 sensory maps.

91

## 92 Results

93

### 94 The absence of ISL1 causes disorganized innervation and abnormal location of neurons 95 in the cochlea

96 To investigate the role of ISL1 in inner ear neuron development, we eliminated *Isl1* by crossing  
97 *Isl1*<sup>loxP/loxP</sup> mice<sup>22</sup> with *Neurod1*<sup>Cre</sup> mice<sup>21</sup>. *Neurod1*<sup>Cre</sup> is expressed in sensory neurons but not  
98 in the sensory epithelium, as visualized by *tdTomato* reporter expression (Additional file 1:

99 Fig. S1). Analyses of ISL1 expression in *Isl1CKO* confirmed efficient recombination by  
100 *Neurod1<sup>Cre</sup>* with virtually no expression of ISL1 already during the differentiation of neurons  
101 in the inner ear ganglion as early as embryonic day E10.5, and later in the cochlear neurons  
102 (Additional file 1: Fig. S2). It is worth mentioning that no difference was observed in the  
103 density of Schwann cells between the spiral ganglia of *Isl1CKO* and control mice (Additional  
104 file 1: Fig. S2C', D').

105 The overall organization of sensory epithelium in the organ of Corti of *Isl1CKO* was  
106 comparable to controls with three rows of OHCs and one row of IHCs (Fig. 1A-E'), as shown  
107 by immunolabeling with a hair cell differentiation marker, *Myo7a*. Whole-mount anti-tubulin  
108 staining of innervation showed reduced and disorganized radial fibers. More significant gaps  
109 were found between radial fiber bundles, crisscrossing fibers, and unusual dense innervation  
110 in the apex, with some large fiber bundles bypassing the organ of Corti and extending to the  
111 lateral wall in the *Isl1CKO* cochlea (arrowhead in Fig. 1E'). Note, efferent fibers did not  
112 correctly form an intraganglionic spiral bundle (IGSB) in *Isl1CKO*.

113 Next, we evaluated the effects of *Isl1* deletion on the formation of the spiral ganglion.  
114 In control animals, the ganglion was arranged in a spiral parallel to the cochlear duct in the  
115 basal and apical half of the cochlea (Fig. 1F, G). In contrast, several SGNs in *Isl1CKO*  
116 accumulated beyond the Rosenthal's canal in the center of the basal turn, in the modiolus  
117 (arrowhead in Fig. 1H) that usually carries only afferent and efferent fibers. Only a few clusters  
118 of neurons were found in the apex (Fig. 1I). The unusual accumulation of cochlear neurons  
119 intertwined with the central axons in the modiolus of *Isl1CKO* compared to the control mice is  
120 depicted in the immunolabeled sections of the cochlea (Fig. 1J, K). A significantly smaller  
121 proportion of neurons located in the regular position parallel to the organ of Corti in the  
122 Rosenthal's canal of *Isl1CKO* compared to the strip of SGNs in the control cochlea (Fig. 1L). In  
123 line with the unusual position of SGNs in the *Isl1CKO* cochlea, much elongated and  
124 disorganized radial fibers extended from the modiolus to the organ of Corti compared to the  
125 control cochlea. Note, efferent bundles of IGSB crossing the radial fibers towards IHCs in  
126 *Isl1CKO* (arrows in Fig. 1H). The radial fibers were significantly lengthened in all sections of  
127 the *Isl1CKO* cochlea (the apex, mid-apex, mid-base, and base; Additional file 1: Fig. S3), but  
128 overall radial fiber density was reduced (Fig. 1M). Anti-tubulin labeling revealed reduced and  
129 disorganized innervation in the region of OHCs in *Isl1CKO* compared to controls (Fig. 1N-Q).  
130 In controls, fibers extending through the tunnel of Corti were oriented towards the base to form  
131 three parallel outer spiral bundles (arrows in Fig. 1N). In contrast, guiding defects in the  
132 extension of these fibers in *Isl1CKO* were obvious with neurites extending with random turns  
133 towards the base and the apex (Fig. 1P, Q).

134 Interestingly, *Isl1* deficiency resulted in the shortening of the cochlea that was on  
135 average about 20% shorter at postnatal day P0 (Fig. 2A-C). Since *Neurod1<sup>Cre</sup>* is expressed only  
136 in the neurons (Additional file 1: Fig. S1), the shortening of the cochlea appears to be a  
137 secondary effect of the abnormalities in neuronal development. A similar phenotype of the  
138 truncated growth of the cochlea was reported for *Neurod1* and *Neurog1* mutants because of  
139 alternations in spatiotemporal gene expression<sup>7, 14, 15, 23</sup>. Correspondingly to truncated cochlear  
140 phenotype<sup>7, 14, 15, 23</sup>, detailed analyses showed abnormalities in the epithelium at the apical end  
141 with disorganized rows of OHCs and ectopic IHCs among OHCs in the *Isl1CKO* cochlea (Fig.  
142 2D-G).

143 Altogether, these results demonstrate the prominent effects of *Isl1* deletion on the  
144 formation of the spiral ganglion and innervation patterns in the cochlea, and a confounding  
145 feature of the truncated cochlea *Isl1CKO* indicates an altered spatial base-to-apex organization  
146 of structural and physiological characteristics of auditory neurons.

147

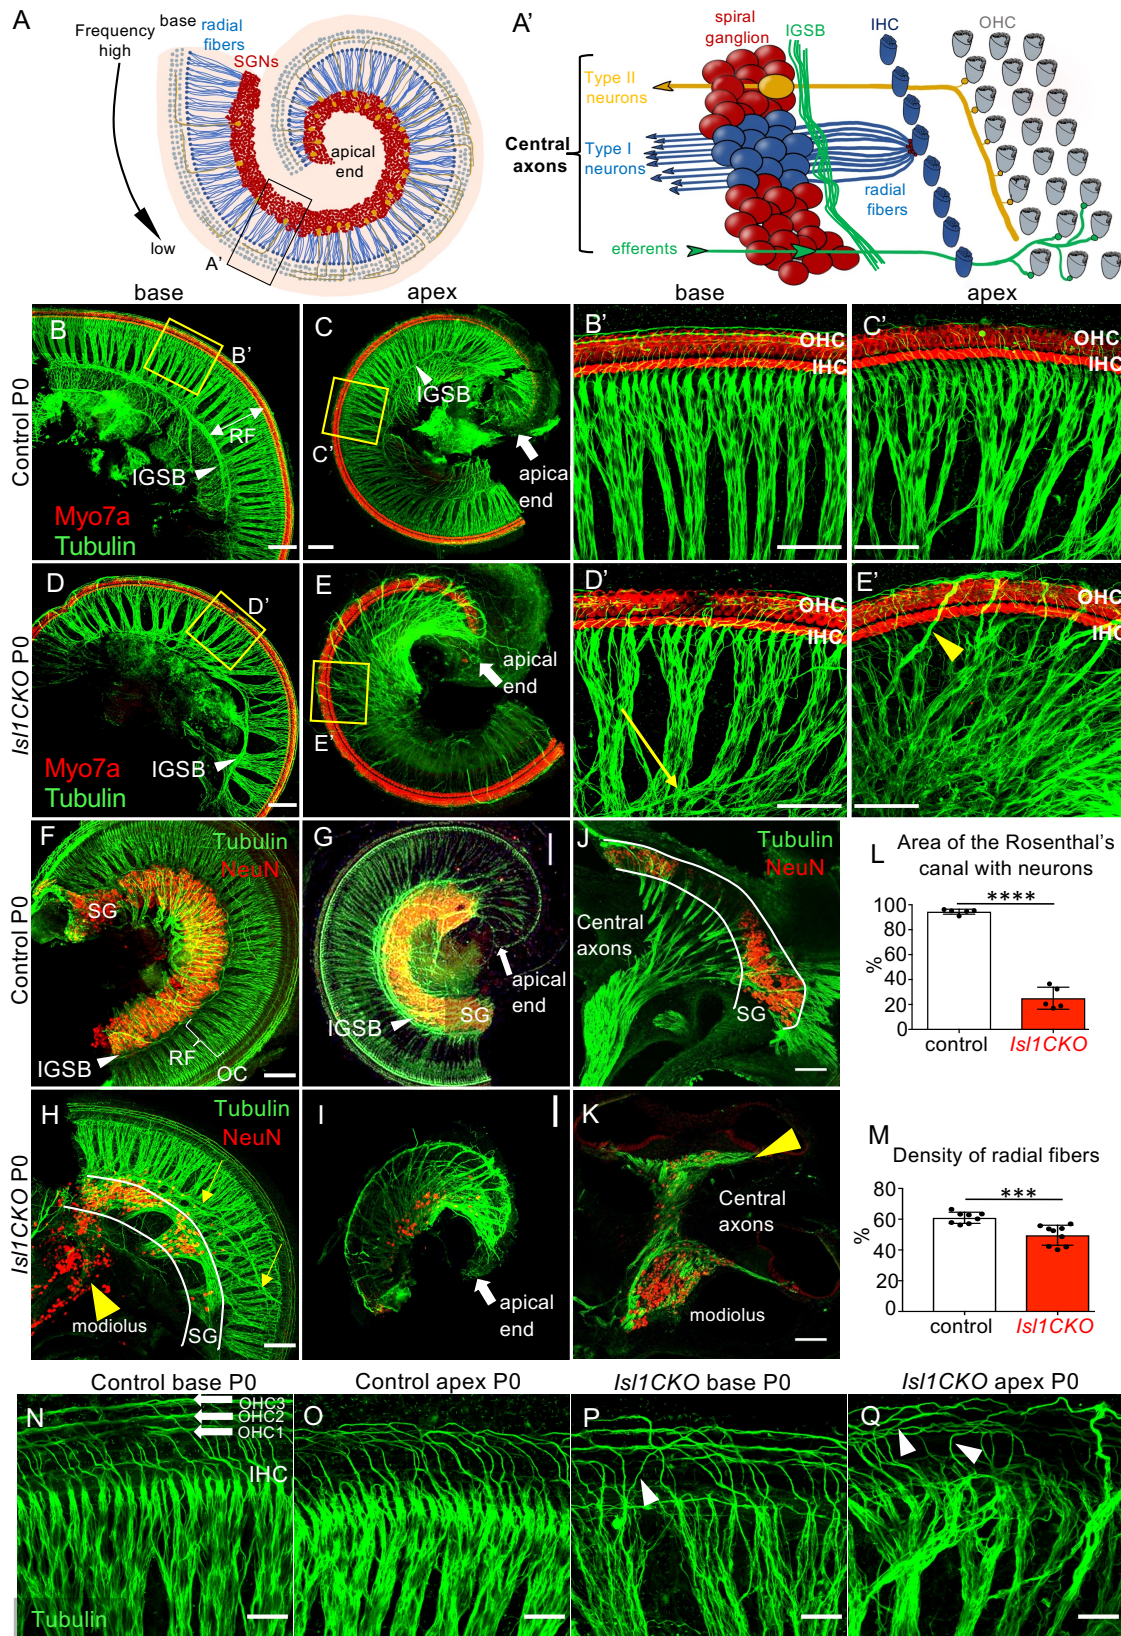

**Figure 1. *Is11* deletion results in abnormalities in cochlear innervation and the formation of the spiral ganglion.** (A) Diagram of the organization of the cochlea. Spiral ganglion neurons (SGNs) are organized tonotopically from the apex to the base of the cochlea. High-frequency sounds maximally stimulate the base of the cochlea, whereas the largest response to low-frequency sounds occurs in the cochlear apex. (A') The top view diagram onto the sensory epithelium shows outer hair cells (OHCs), inner hair cells (IHCs), and spiral ganglion. Type I neurons extend radial fibers toward IHCs (5-30 neurons innervate one IHC), and type II neurons (representing 5% of SGNs) receive input from OHCs. The central processes of SGNs relay acoustic information to the brain. (Continued)

**Figure 1 continued**

Efferent axons from the superior olivary complex, forming the intraganglionic spiral bundle (IGSB), innervate OHCs. (B-E) Representative images of whole-mount immunolabeling of the cochlear base and apex with anti-Myo7a (a marker of hair cells) and anti-tubulin (nerve fibers) show reduced and disorganized radial fibers (RF), and missing or altered efferent fibers forming IGSB (arrowhead) in *Isl1CKO* compared to control at postnatal day P0. (B'-E') Higher-magnification images show three rows of OHCs and a row of IHCs forming the organ of Corti and connected to SGNs by RF. Abnormalities in innervation, including larger gaps between radial fiber bundles, crisscrossing fibers (arrows), and fiber bundles bypassing the organ of Corti (arrowheads in E'), are noticeable in the *Isl1CKO* cochlea. (F-I) The shape of the spiral ganglion (SG) is shown in the split basal and apical half of the cochlea in whole-mount immunolabeling with anti-NeuN (a nuclear marker of differentiated neurons) and with anti-tubulin (nerve fibers). In controls, anti-NeuN labeled neurons form a spiral parallel to the organ of Corti (OC) with central axons and RF at P0. In contrast, only a small portion of NeuN<sup>+</sup> neurons are located in the Rosenthal's canal parallel to the OC in *Isl1CKO* (delineated by white lines in H). The majority of NeuN<sup>+</sup> neurons is located in the modiolus (arrowhead). The apical half of the *Isl1CKO* cochlea contains only clusters of neurons (I). Note disorganized IGSB with fiber bundles directly reaching hair cells (arrows in H) and missing IGSB formation in the apex (I). (J, K) The vibratome sections of the cochlea labeled with anti-tubulin and anti-NeuN show the unusual position of cochlear neurons in the modiolus and neurons entangled in central axons in *Isl1CKO* compared to control (arrowhead indicates a normal position of the SG). (L) Relative comparison of the area of the spiral ganglion in the Rosenthal's canal containing neurons between control and *Isl1CKO*. The values represent mean  $\pm$  SD (controls n = 5; *Isl1CKO* n = 5); *t*-test \*\*\*\*P < 0.0001. (M) The density of radial fibers in the base, mid-base, and mid-apex were lower in the *Isl1CKO* than in the control cochlea. The values represent mean  $\pm$  SD (n = 3 cochlea per genotype); *t*-test \*\*\*\*P < 0.0001. (N-Q) Higher-magnification images show a detail of anti-tubulin labeled innervation with fibers forming three parallel outer spiral bundles (arrows) that innervate multiple OHCs and turning toward the base in the control cochlea. Guiding defects in the extension of these fibers to OHCs are obvious in *Isl1CKO* with some fibers randomly turned toward the apex (arrowheads); note, the disorganization of radial fiber bundles in *Isl1CKO*. Scale bars: 100  $\mu$ m (B-K), 50  $\mu$ m (B'-E'), 20  $\mu$ m (N-Q).

148

149 ***Isl1* regulates neuronal identity and differentiation programs of SGNs**

150 To gain insight at the molecular level about how the *Isl1* elimination causes the neuronal  
151 phenotype in the cochlea, we sought to identify potential ISL1 targets through global  
152 transcriptome analysis. We opted to use Bulk-RNA sequencing to obtain sequencing depth and  
153 high-quality data<sup>24</sup>. Six biological replicates were used per each genotype, and each replicate  
154 contained a total of 100 tdTomato positive SGNs isolated from the cochlea embryonic age  
155 E14.5. Spiral ganglia were dissected, dissociated into single cells, and fluorescent tdTomato<sup>+</sup>  
156 cells were FACS-sorted (Fig. 3A). Compared to controls, 650 protein-coding genes were  
157 differentially expressed in *Isl1CKO* neurons (adjusted p-value < 0.05, and fold change > 2 cut-  
158 off values, see Methods), 332 genes down- and 318 genes up-regulated (Fig. 3B, Additional  
159 file 2: Table S1). Gene ontology (GO) term enrichment analysis for the GO term category  
160 biological process revealed highly enriched GO terms associated with neuron development,  
161 including neurogenesis, neuron differentiation, and nervous system development, in both up-  
162 and down-differentially expressed genes (Fig. 3C, Additional file 2: Table S2, S3). The most  
163 enriched and specific GO categories for downregulated genes were associated with  
164 neurotransmission-related machinery, such as transmembrane transporter, voltage-gated  
165 channel, cation and ion transport, and membrane potential regulation, indicating changes in  
166 neuronal cell functions. The analysis identified enrichment of downregulated genes involved  
167 in axon development, guidance, axonogenesis, and neuronal migration. These genes included  
168 members of all four different classes of axon guidance molecules and their cognate receptors,  
169 the ephrins-Eph, semaphorins-plexin, netrin-unc5, and slit-roundabout<sup>25</sup>, for instance, *Epha5*,  
170 *Epha4*, *Pdzn3*, *Sema3e*, *Sema6d*, *Plxna4*, *Ntn3*, *Ntng1*, *Ntng2*, *Kirrel3*, *Unc5b*, *Unc5c*, *Slitrk3*,  
171 and *Slitrk1*. The neurotrophic tyrosine kinase receptors (*Ntrk2* and *Ntrk3*) and a G-protein-  
172 coupled chemokine receptor (*Cxcr4*), important regulators of neuronal migration, were also  
173 downregulated<sup>26</sup>. These molecular differences dovetail well with abnormalities in the  
174 innervation pattern and SGN migration defects in the *Isl1CKO* cochlea. In contrast, upregulated  
175 genes particularly enriched in *Isl1CKO* neurons were associated with “regulation of synapse

176 organization, synapse structure or  
177 activity” as well as “regulation of  
178 synapse assembly”, arguing for  
179 compensation of dramatic changes in the  
180 ability of neurons to form neuronal  
181 projections towards their targets.  
182 Upregulated genes encoding molecules  
183 critical for synapse formation and  
184 adhesion included several members of  
185 the cadherin superfamily (*Cdh7*, *Cdh10*,  
186 *Pcdh8*, *Pcdh9*, *Pcdh10*, *Pcdh18*, and  
187 *Pcdh19*), adhesion-related genes (*Ptprd*,  
188 *Ptprs*, *Cntnap2*, *Itga4*, *Itga5*), and the  
189 ephrin ligands (*Efna3*, *Efna5*).  
190 Interestingly, “synaptic signaling” was  
191 among GO terms with the significant  
192 representation in both up- and down-  
193 regulated genes, suggesting changes in  
194 synaptic circuits and neuronal activity.  
195 We also found many genes encoding  
196 transcription factors and signaling  
197 molecules, indicating that ISL1 may act  
198 through transcription networks instead of  
199 defined target genes. The expression of  
200 neural-specific bHLH factors important  
201 for differentiation and maturation of  
202 neurons was increased in *Isl1CKO*,  
203 including members of NeuroD  
204 (*Neurod6*, *Neurod2*), Nscl (*Nhlh2*), and  
205 Olig (*Bhlhe23*) families<sup>27</sup>. The increased  
206 expression of genes encoding LIM  
207 domain proteins, the transcription factors  
208 *Lhx1*, *Lhx2*, *Lmo2*, *Lmo3*, and a core  
209 member of the PCP signaling paradigm, *Prickle1*,  
210 was detected in *Isl1CKO* neurons. *Prickle1*  
211 is an important regulator of neuron migration  
212 and neurons' distal and central projections  
213 in the cochlea<sup>28</sup>. Some of the identified  
214 genes encoding regulatory molecules that  
215 were shown to be essential for neuronal  
216 development, the formation of SGNs, and  
217 their projections were downregulated in  
218 *ISL1CKO* neurons, such as signaling  
219 molecules *Shh*<sup>29</sup>, *Wnt3*<sup>30</sup>, and *Fgfs*  
220 (*Fgf10*, *Fgf11*, and *Fgf13*)<sup>31, 32</sup>, and  
221 the transcription factors *Gata3*<sup>9, 10</sup>,  
*Irx1*, *Irx2*, *Pou3f2*, *Pou4f2*<sup>18</sup>, and  
*Runx1*<sup>20, 30</sup>. Selected differentially  
expressed genes from the RNAseq analysis,  
namely *Lhx1*, *Lhx2*, *Cdh7*, *Nhlh2*,  
*Ntrk2*, and *Ntrk3*, were further  
validated by RT-qPCR of RNA isolated  
from whole inner ears of E14.5 embryos  
(Additional file 1: Fig. S4).

Altogether, these changes indicate that  
ISL1 regulates transcriptional networks  
that underlie neuronal identity and  
function during differentiation of SGNs  
and that *Isl1* elimination results in a  
major impairment in the development,  
axonogenesis, migration, and molecular  
characteristics of these neurons.

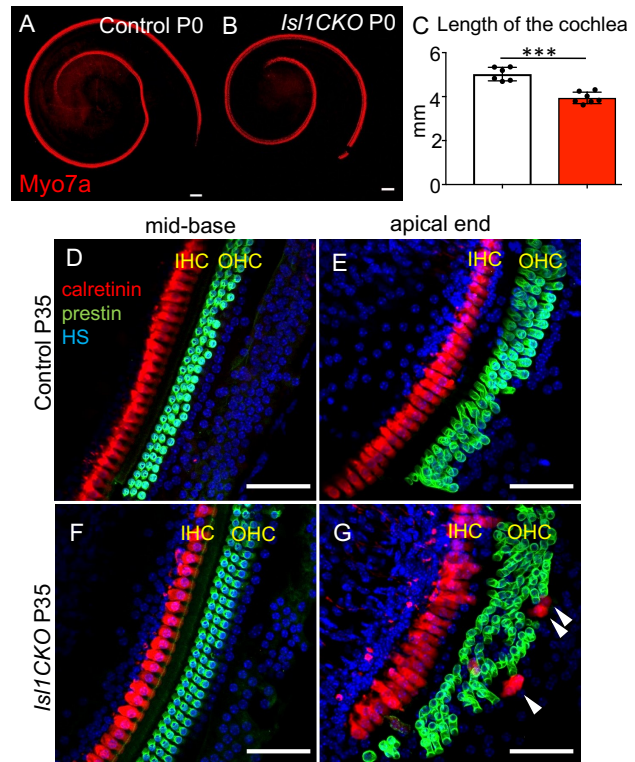

**Figure 2. The length of the organ of Corti is shortened in *Isl1CKO*.** (A-C) The organ of Corti of *Isl1CKO* is 20% shorter than control at P0, as shown by anti-Myo7a labeling of hair cells. The values represent mean  $\pm$  SEM (controls  $5.0 \pm 0.1$  mm,  $n = 6$ ; *Isl1CKO*  $3.9 \pm 0.1$  mm,  $n = 7$ );  $t$ -test \*\*\* $P < 0.001$ . (D-G) Immunohistochemistry for prestin (a marker for OHCs) and calretinin (a marker for IHCs) shows a comparable cytoarchitecture of the organ of Corti in the cochlear base of controls and *Isl1CKO* but disorganized rows of OHCs in the apical end with multiple HC rows and ectopic calretinin<sup>+</sup> IHCs among OHCs cells (arrowheads) in *Isl1CKO* at P36. HS, Hoechst nuclear staining. Scale bars: 100  $\mu$ m (A, B), 50  $\mu$ m (D-G).

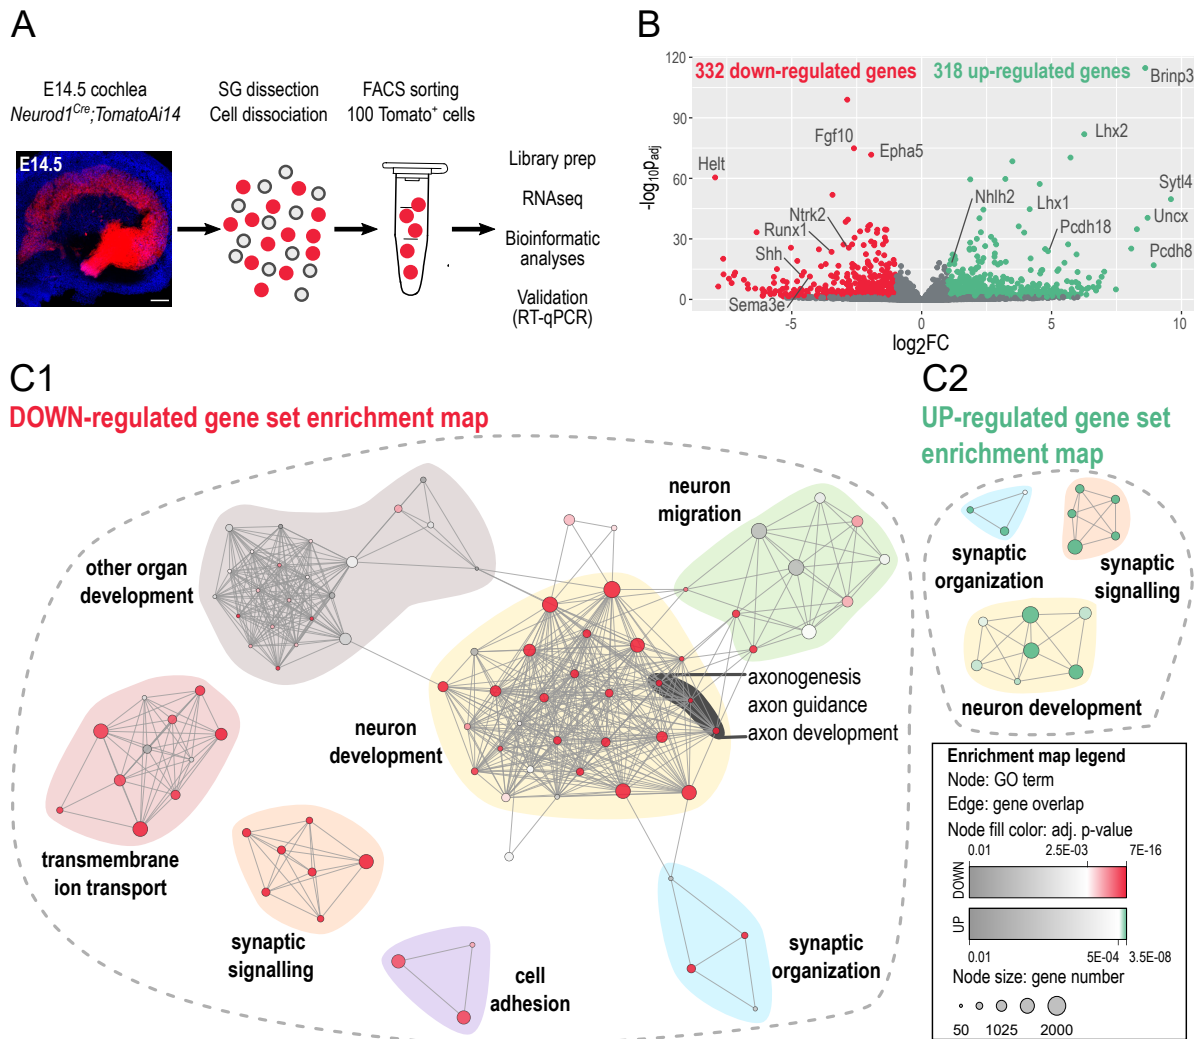

**Figure 3. Comparative analysis of control and *Is1CKO* transcriptomes. (A)** Image of the whole-mount cochlea with genetically labeled tdTomato neurons in the spiral ganglion at E14.5 (HS, Hoechst nuclear staining, Scale bar: 100  $\mu$ m); and workflow depicts microdissection, dissociation, FACS sorting of single tdTomato<sup>+</sup> spiral ganglion neurons for a bulk of 100 cells RNAseq analysis. **(B)** The volcano plot shows the change in protein-coding genes' expression level in the *Is1CKO* compared to control spiral ganglion neurons (adjusted p-value < 0.05, and fold change > 2 cutoff values). The complete list of identified 332 down- and 318 up-differentially expressed genes is in Additional file 2, Table S1. **(C)** Enrichment map of down- (C1) and up-regulated (C2) gene ontology (GO) sets visualized by the network. Each node represents a GO term; edges depict shared genes between nodes. Node size represents a number of genes of the mouse genome per the GO term, and node fill color represents a GO term significance. Each GO set cluster was assigned with representative keywords; a list of GO sets is available in Additional file 2, Table S2, S3).

222

### 223 *Is1CKO* mice have altered hearing function

224 Considering the substantial abnormalities in the formation of the spiral ganglion, innervation,  
225 and molecular neuron features, we assessed the hearing function of *Is1CKO* mice. We  
226 evaluated distortion product otoacoustic emissions (DPOAE) to determine the robustness of  
227 OHC function and cochlear amplification. Otoacoustic emissions are a physiological byproduct  
228 of an active amplification mechanism when sound-induced vibrations are amplified in a  
229 frequency-specific manner by the OHCs of the organ of Corti<sup>33, 34</sup>. Compared to controls, the  
230 DPOAE responses of *Is1CKO* were significantly reduced in the frequency range between 4  
231 and 24 kHz (Fig. 4A). DPOAE amplitudes at frequencies of 28 kHz and higher were  
232 comparable between control and *Is1CKO* mice. Based on the physiological place-frequency



233

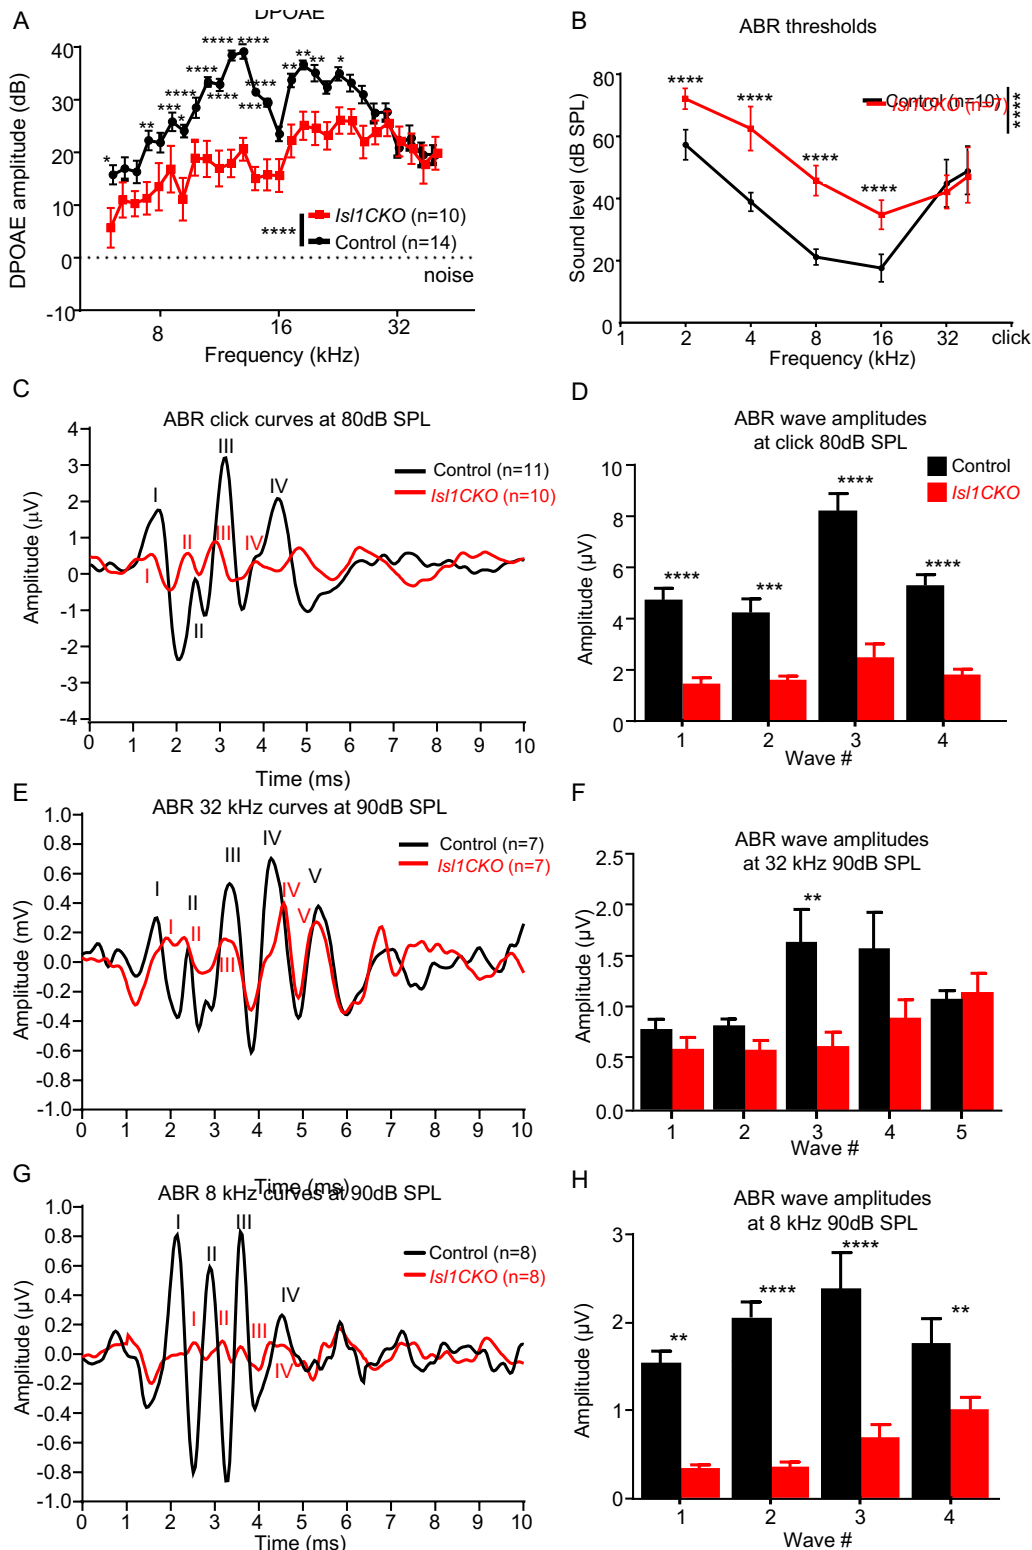

**Figure 4. Hearing impairment is detected in *Isl1CKO* mice.** (A) Distortion product otoacoustic emissions (DPOAEs) show significantly reduced levels in the low and middle-frequency range (6 - 24 kHz). Data are the mean  $\pm$  SEM, two-way ANOVA with Bonferroni post-hoc test, \* $P < 0.05$ , \*\* $P < 0.01$ , \*\*\* $P < 0.001$  \*\*\*\* $P < 0.0001$ . (B) The average auditory brainstem response (ABR) thresholds of *Isl1CKO* and control mice are analyzed by click-evoked ABR. Data are the mean  $\pm$  SD, two-way ANOVA with Bonferroni post-hoc test, \*\*\*\* $P < 0.0001$ . The graphs show averaged ABR response curves evoked (C) by an 80 dB SPL click; (E) by a 90 dB SPL pure tone of 32 kHz frequency; and (G) by a 90 dB SPL pure tone of 8 kHz frequency. (D, F, H) Averaged individual ABR wave amplitudes are shown for the corresponding peaks. Data are the mean  $\pm$  SEM, two-way ANOVA with Bonferroni post-hoc test, \*\* $P < 0.01$  \*\*\* $P < 0.001$ , \*\*\*\* $P < 0.0001$ .

234 map in the normal mouse cochlea<sup>35</sup>, frequencies above 28 kHz are located at the basal half of  
235 the cochlea from the mid-base to the basal end. These most preserved DPOAE responses  
236 correspond to the most close-to-normal distribution of sensory neurons in the cochlear base in  
237 *Isl1CKO* mice (Fig. 1H). Thus, decreased DPOAE responses may be attributed to the overall  
238 more profound morphological abnormalities in the apex, including a diminished spiral  
239 ganglion, disorganized innervation (Fig. 1E, E', I, Q), and disorganized rows of OHCs in the  
240 apical end (Fig. 2G).

241 We evaluated auditory brainstem responses (ABRs), which measure electrical activity  
242 associated with the propagation of acoustic information through auditory nerve fibers.  
243 Measurements of ABR thresholds showed that all *Isl1CKO* animals displayed elevated  
244 thresholds indicative of hearing loss compared to age-matched control animals, except at  
245 frequencies above 32 kHz, which were comparable to ABR thresholds in control mice (Fig.  
246 4B). Using click-evoked ABR, we evaluated waveform characteristics associated with the  
247 propagation of acoustic information through the auditory nerve to higher auditory centers (Fig.  
248 4C). Wave I reflects the synchronous firing of the auditory nerve. In contrast, waves II–V are  
249 attributed to the electrical activity of downstream circuits in the CN, superior olivary complex,  
250 lateral lemniscus, and inferior colliculus<sup>36</sup>. The amplitudes of ABR waves I-IV were  
251 significantly reduced in *Isl1CKO* (Fig. 4D). Since the ABR threshold for 32 kHz and above  
252 were comparable between age-matched controls and *Isl1CKO* mutants (Fig. 4B), we used the  
253 pure-tone stimuli of 32 kHz to evaluate ABR responses (Fig. 4E). A significant difference  
254 amongst the genotypes was only found for amplitude reduction of wave III (Fig. 4F), thus  
255 indicating preserved synchronized activities of peripheral and brainstem auditory processing.  
256 Although waves I and II amplitude for both mutant and control mice were similar, there were  
257 apparent differences in the ABR waveform morphology. The latency of ABR wave I was  
258 delayed, the relative interwave latency between peaks I and II was shortened, and the trough  
259 between wave I and II diminished, resulting in a fusion of both peaks in *Isl1CKO*. A delay of  
260 the leading peak of ABR wave I recovered towards ABR wave III. The changes in wave I and  
261 II characteristics reflect abnormalities in the summated response from SGNs, auditory nerve  
262 fibers, and most likely the CN.

263 Additionally, we used the pure-tone stimulus of 8 kHz to evaluate ABR responses (Fig.  
264 4G), as ABR thresholds for 8 kHz were significantly reduced for *Isl1CKO* mice. In contrast to  
265 the ABR amplitudes at 32 kHz stimuli, the ABR amplitudes for 8 kHz pure-tone stimuli were  
266 significantly reduced for all waves (Fig. 4H). The results indicate abnormalities in the cochlear  
267 auditory neurons and propagation of acoustic information through auditory nerve fibers to  
268 higher auditory centers. We observed a marked drop in the wave I growth function. Still, by  
269 comparing wave I and IV peaks, the increased central gain was noted in *Isl1CKO* (Additional  
270 file 1: Fig. S5), indicating compensatory plasticity at higher auditory circuits for cochlear  
271 damage with diminished afferent input<sup>37</sup>.

272

### 273 ***Isl1CKO* mice have structural abnormalities in the ascending auditory pathways**

274 Having recognized the major effects of *Isl1* elimination on the formation of the spiral ganglion  
275 and auditory dysfunction, causing sensory hearing loss, as measured by ABRs, we next wanted  
276 to establish the morphology of the central auditory pathway components. Using dye tracing,  
277 we evaluated the segregation of central axons of the auditory nerve (the cranial nerve VIII; Fig.  
278 5A, schematic view of dye applications). In controls, the central axons labeled by dyes applied  
279 into the cochlear base (red) and apex (green) are segregated in the auditory nerve and from the  
280 vestibular ganglion, labeled by dye injected into the vestibular end-organs (magenta, Fig. 5B).  
281 In contrast, the central axons from the cochlear base (red) and apex (green) virtually overlapped  
282 in the auditory nerve (overlapping yellow fibers), and many neurons labeled by the cochlear  
283 dye applications were detected to be intermingled with vestibular neurons in *Isl1CKO* (Fig.

284

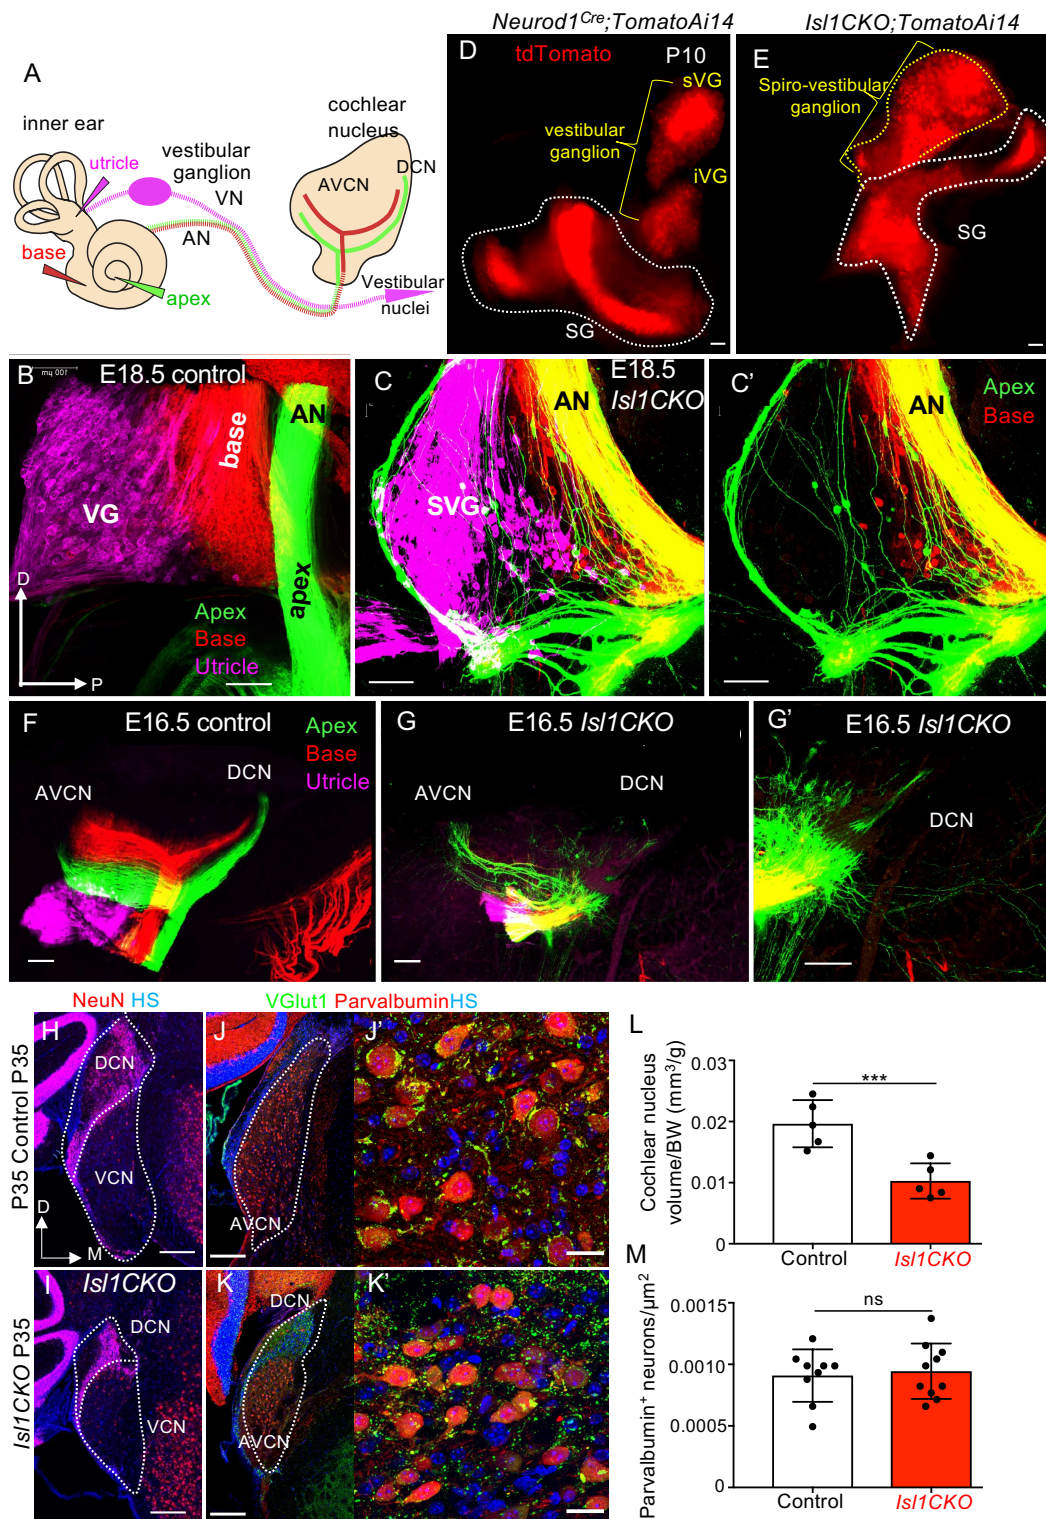

**Figure 5. *Isl1CKO* cochlear neurons project unsegregated and disorganized central projections to the cochlear nucleus.** (A) The schematic diagram visualizes dye tracing from the inner ear and its connections to the auditory brainstem, using insertions of differently colored dyes into the vestibular end organ (the utricle, magenta), cochlear base (red), and cochlear apex (green). Axonal projections from cochlear neurons to the cochlear nucleus (CN) bifurcate with one branch synapsing in the dorsal (DCN) and the other innervating the anteroventral CN (AVCN). (B-C') Injections of different colored dyes (magenta into the utricle, red in the base, green in the apex) label distinct and spatially restricted bundles of neuronal fibers (auditory nerve, AN) projecting to the CN and the vestibular ganglion in controls. In contrast, in *Isl1CKO*, the segregation of central axons is lost, as fibers labeled from the apex (green) and base (red) are completely overlapping in the AN (yellow fibers), and neurons labeled by dyes injected into the cochlear base and apex are mixed with vestibular ganglion neurons (magenta) to form an aberrant enlarged ganglion, the spiro-vestibular ganglion (SVG). A merged image shows apical turn dye and base dye-labeled fibers and soma in the SVG (C'). (Continued)

**Figure 5 continued**

Note that fibers labeled from the apex (green) form an unusual fiber loop around the SVG in *Isl1CKO* (C, C'). (D, E) Whole-mount of the inner ear with tdTomato reporter labeled neurons shows superior (sVG) and inferior vestibular ganglia (iVG), and the spiral ganglion (SG) in the control reporter mouse. In contrast, vestibular ganglia are fused and enlarged, and the spiral ganglion has lost its spiral shape in *Isl1CKO*, shown at postnatal day P10. (F-G') The tonotopic organization of the CN subdivisions in controls is shown by dye tracing in the AVCN and DCN with low-frequency fibers labeled from the apex (green) and high frequency from the base (red). Projections from the base terminate dorsally to the projections from the apex in the control CN. Central projections of afferents in *Isl1CKO* enter as a single bundle from the apex and base instead of forming separate central projections, with just a few fibers occasionally expanding to the DCN. (H, I) Coronal sections of a brain (immunostained with anti-NeuN, red) of adult littermate controls and *Isl1CKO*, showing the DCN and VCN; the dotted line indicates the boundaries of the CN. (J, K) Representative images of immunolabeling sections of the brain at P35 using anti-parvalbumin to label the bushy cell soma and anti-VGlu1 to label auditory-nerve endbulbs of Held around the spherical and globular bushy cells. (J', K') Higher-magnification images show the distribution of parvalbumin<sup>+</sup> neurons and the presence of VGlu1<sup>+</sup> auditory nerve synaptic terminals. (L) Quantification of the adult CN volume, adjusted to body weight and (M) a number of parvalbumin<sup>+</sup> cells per  $\mu\text{m}^2$  of the AVCN. Data are the mean  $\pm$  SD. Two-tailed unpaired *t*-test (\*\**P* < 0.001; ns, not significant). D, dorsal; P, posterior; M, medial axis. HS, nuclear staining Hoechst. Scale bars: 100  $\mu\text{m}$  (B-G'); 200  $\mu\text{m}$  (H-K); 20  $\mu\text{m}$  (J', K').

285 5C), forming an aberrant spiro-vestibular ganglion. A merged image shows only apical and  
286 basal dye-labeled neuron somas and fibers located in the spiro-vestibular ganglion of *Isl1CKO*  
287 (Fig. 5C'). The unusual fibers labeled by the apical dye application (green) were looping around  
288 the vestibular ganglion in *Isl1CKO* (Fig. 5C, C'). The distinctive shape of inner ear ganglia in  
289 *Isl1CKO* was also confirmed by the tdTomato reporter (Fig. 5D, E). Superior and inferior  
290 vestibular ganglia, and the spiral ganglion, recognizable as a coil of cochlear auditory neurons,  
291 were clearly distinguished in the control reporter mouse. In contrast, the vestibular ganglia  
292 were fused and enlarged, and the cochlear ganglion lost its spiral shape in *Isl1CKO* (Fig. 5E).  
293 Unfortunately, the mixing of spiral and vestibular ganglion neurons in *Isl1CKO* mice precluded  
294 a full quantitative assessment.

295 The CN is the first structure of the ascending auditory pathways, where the auditory  
296 nerve fibers project. The auditory nerve bifurcated with one branch, synapsing in the  
297 posteroventral (PVCN) and dorsal (DCN) CN and the other innervating the anteroventral CN  
298 (AVCN; Fig. 5A). Dye tracing showed segregated projections of apical and basal cochlear  
299 afferents forming parallel isofrequency bands in controls (Fig. 5F). In contrast, comparable  
300 injections in *Isl1CKO* showed that axonal projections to the CN were reduced, restricted, and  
301 disorganized and lacked a clear apex and base projection segregations (Fig. 5G). Only a few  
302 fibers can occasionally be seen expanding to the DCN in *Isl1CKO* (Fig. 5G'). These results  
303 show that tonotopic organization of both the auditory nerve and the CN is lost in *Isl1CKO*, as  
304 the cochlear apex and base projections are not segregated. Since the size and number of neurons  
305 in the CN depend on input from the auditory nerve during a critical development period up to  
306 P9<sup>38</sup>, we also analyzed the volume of the CN of *Isl1CKO*. The volume of the CN of adult  
307 mutants was reduced by approximately 50% compared to controls at postnatal day P35 (Fig.  
308 5H, I, L). As *Isl1* is not expressed in the CN<sup>15</sup>, the reduced size is likely a secondary effect  
309 associated with reduced afferent input consistent with the impact of neonatal cochlear ablation  
310 previously reported<sup>2</sup>.

311 The CN contains a variety of neurons with distinct features. The spherical and globular  
312 bushy cells are principal cells that receive large auditory nerve endings, called “endbulbs of  
313 Held” and “modified endbulbs,” specialized for precise temporal firing<sup>1, 39</sup>. Using anti-  
314 parvalbumin to label bushy cell somata and anti-VGlu1 to label auditory-nerve endbulbs of  
315 Held around the spherical and globular bushy cells<sup>40, 41</sup>, we demonstrated that auditory  
316 afferents of *Isl1CKO* and controls formed comparable clusters of boutons that wrap the somas  
317 of their targets. Although the CN of *Isl1CKO* was smaller, the number of parvalbumin<sup>+</sup> neurons  
318 per  $\mu\text{m}^2$  was similar in the VCN of controls and *Isl1CKO* (Fig. 5J-K', M).

319

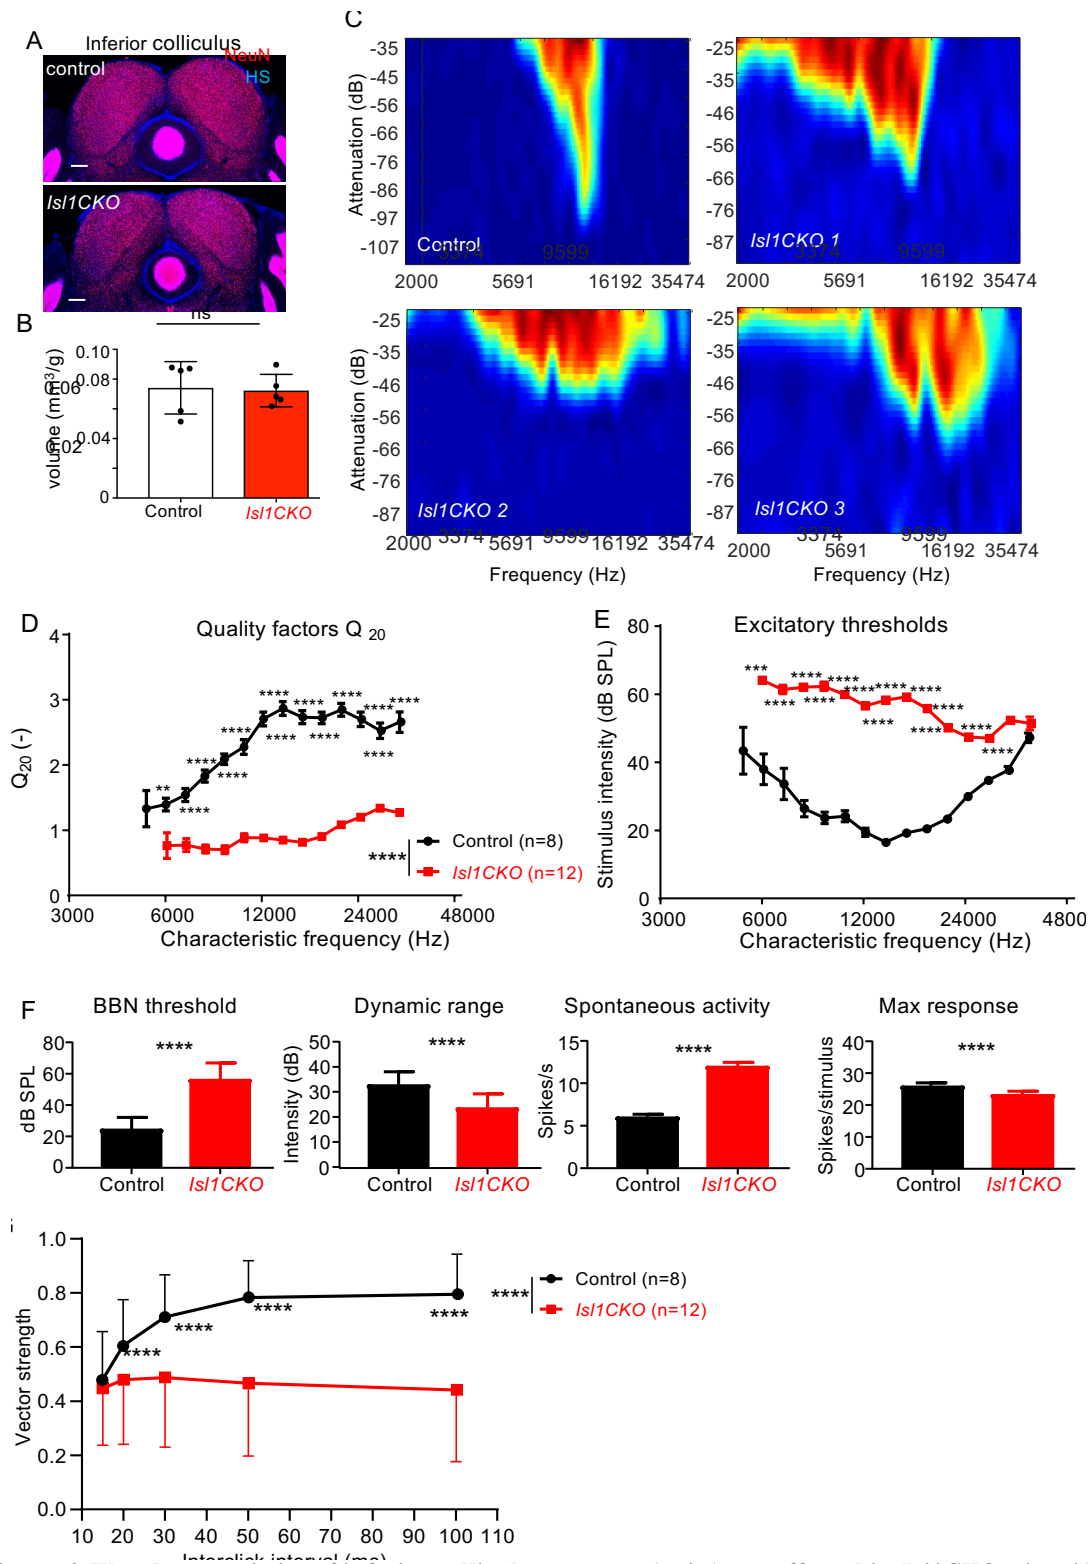

**Figure 6. The characteristics of inferior colliculus neurons (units) are affected in *Isl1CKO* mice.** (A) Immunostaining of coronal brain sections for NeuN and HS, nuclear staining Hoechst, and (B) quantification of the volume of the adult control and *Isl1CKO* inferior colliculus (IC; n = 5), adjusted to body weight. Data are the mean  $\pm$  SD. Two-tailed unpaired *t*-test (ns, not significant). Scale bars, 200  $\mu$ m. HS, nuclear staining Hoechst (blue). (C) Representative examples of tuning curves recorded in the IC display impairments in tuning properties with broad and irregular receptive fields in *Isl1CKO* compared to control mice. (D) Excitatory thresholds of the IC neurons at different characteristic frequencies (CF) are shown as averages in 0.3-octave bins in control and *Isl1CKO* mice. (E) The sharpness of the neuronal tuning expressed by quality factor  $Q_{20}$  (the ratio between the CF and bandwidth at 20 dB above the minimum threshold) averaged in 0.3-octave bins is decreased in *Isl1CKO*. Data are mean  $\pm$  SEM. Two-way ANOVA with Bonferroni post hoc test. \*\**P* < 0.01, \*\*\**P* < 0.001, \*\*\*\**P* < 0.0001. (F) Comparison of the rated intensity function parameters between control (n = 8) and *Isl1CKO* (n = 12) mice: broadband noise (BBN) threshold, dynamic range, spontaneous activity, and maximum response magnitude. Data are mean  $\pm$  SD; unpaired *t*-test, \*\*\*\**P* < 0.0001. (G) Synchronization of units with click trains. Vector strength computed for different inter-click intervals. Data are the mean  $\pm$  SD, two-way ANOVA with Bonferroni post-hoc test, \*\*\*\**P* < 0.0001.

320 **The tuning properties and excitability of inferior colliculus neurons are distorted in**  
321 ***Isl1CKO***

322 Having established neuroanatomical changes in the CN, we next evaluated the inferior  
323 colliculus (IC) properties, which is the principal auditory structure of the midbrain for the  
324 ascending auditory pathways and descending inputs from the ascending auditory pathways  
325 auditory cortex<sup>42</sup>. The IC allows for sound localization, integrates multisensory and non-  
326 auditory contributions to hearing, and plays an essential role in generating the startle response.  
327 We demonstrated no significant IC size reduction in *Isl1CKO* compared to control mice (Fig.  
328 6A, B). We compared neuronal characteristics in the central nucleus of the IC of *Isl1CKO* and  
329 control animals using multichannel electrodes. Extracellular electrophysiological recordings of  
330 neuronal activity in controls showed a well-defined narrow single-peaked profile of the  
331 excitatory receptive fields. In contrast to primarily wide-receptive fields, we observed two or  
332 more peaks in *Isl1CKO* mice (Fig. 6C), suggesting multiple inputs from the lower levels of the  
333 auditory system. A commonly used metric unit of auditory tuning is the “quality factor,” or Q,  
334 defined as the characteristic frequency (CF) divided by the bandwidth, measured at 20 dB  
335 above the minimum threshold ( $Q_{20}$ ). Results revealed a significantly lower quality factor in the  
336 mutant mice (Fig. 6D), showing substantially worsened frequency selectivity.

337 The investigation of the responsiveness of IC units to different sound frequencies  
338 revealed higher excitatory thresholds in *Isl1CKO* than in control animals in all measured  
339 frequencies except for the highest recorded frequencies above 28 kHz (Fig. 6E). These  
340 comparable excitatory thresholds for high frequencies between control and *Isl1CKO* mice are  
341 consistent with the ABR measurements. We quantified the activity of IC neurons based on the  
342 sound intensity, the neuronal responses to a variable intensity of broadband noise (BBN) bursts  
343 were analyzed. Compared to control mice, the IC neuronal responses in *Isl1CKO* had a higher  
344 BBN threshold, narrower dynamic range, higher spontaneous activity, and significantly lower  
345 maximum response magnitudes (Fig. 6F). The results suggest a functional reduction in  
346 sensitivity to sound, audibility, and intensity discrimination, as well as increased excitability  
347 of IC neurons in *Isl1CKO* mice.

348 To evaluate the precise temporal representation of sound into the central auditory  
349 system, we performed an acoustic stimulation of the IC units with trains of five clicks with  
350 different inter-click intervals from 100 ms up to 15 ms. In control mice, the increasing time  
351 interval between the clicks led to a better synchronization of neuronal responses with the  
352 individual clicks in the train, implying the precision and reliability of the temporal sound  
353 discrimination ability (Fig. 6G). In contrast, the precise temporal decoding in *Isl1CKO* was  
354 disrupted, as the synchronization of neuronal responses was significantly lower for the whole  
355 range of inter-click intervals. In the case of the *Isl1CKO*, the synchronization level of neuronal  
356 responses remains almost constant, suggesting a lack of precise temporal sound processing.

357  
358 **The abnormal development of primary auditory neurons alters the auditory behavior of**  
359 ***Isl1CKO* mice**

360 Next, we evaluated the behavioral responses of *Isl1CKO* mice to sound stimuli. The acoustic  
361 startle response (ASR) is usually used as a behavioral readout of hearing status mediated by a  
362 brainstem circuit linking cochlear root neurons to spinal motoneurons. The structural basis of  
363 the ASR includes cochlear root neurons, neurons of the CN, the nucleus of the lateral  
364 lemniscus, the caudal pontine reticular nucleus, spinal interneurons, and spinal motor neurons  
365<sup>43, 44, 45</sup>. Similar to the ABR thresholds, the ASR thresholds of *Isl1CKO* significantly increased  
366 for startle tone stimuli of 8 kHz and BBN, but not for the high-frequency startle tones (Fig.  
367 7A). The peak latency of the ASR to the BBN stimulation at the 110 dB SPL intensity was  
368 prolonged in *Isl1CKO* compared to control mice (Fig. 7B), indicating a slower reaction to the  
369 acoustic stimuli. We found significantly reduced ASR amplitudes for all tested sound stimuli

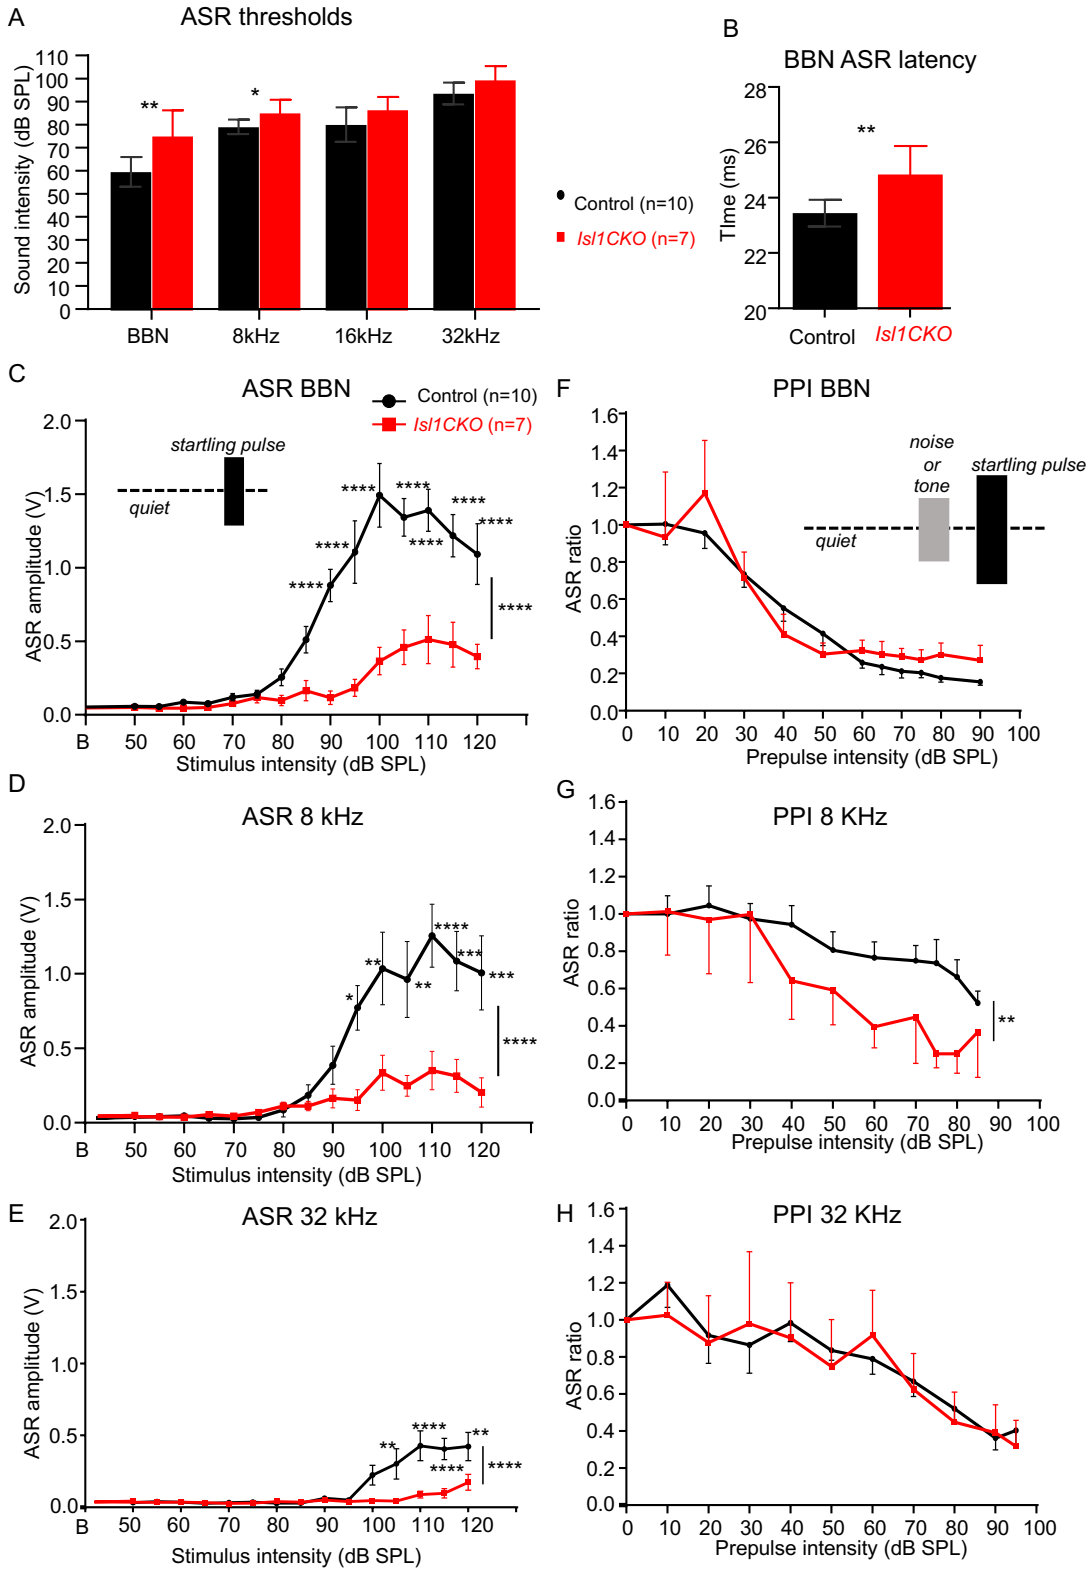

**Figure 7. The acoustic startle reflex (ASR) and prepulse inhibition (PPI) responses are altered in the *Is1CKO* mutant.** (A) The graph shows the ASR thresholds for broadband noise (BBN) bursts and tone pips at 8, 16, and 32 kHz in control and *Is1CKO* mice. Data are mean ± SEM. Holm-Sidak method multiple comparison *t*-tests. \**P* < 0.05, \*\**P* < 0.01. (B) Significantly increased ASR latency to BBN is found in *Is1CKO* compared to control mice. Data are mean ± SEM. unpaired *t*-test, \*\**P* < 0.01. (C) Amplitude-intensity ASR functions for BBN stimulation and (D) for tone pips of 8 kHz and (E) 32 kHz at different dB SPL intensities in control and *Is1CKO* mice. (F) Efficacy of prepulse intensity on the relative ASR amplitudes was measured the BBN, (G) 8 kHz, and (H) 32 kHz tone prepulse. ASR ratio = 1 corresponds to the ASR amplitude without a prepulse (the uninhibited ASR). Data are mean ± SEM. Two-way ANOVA with Bonferroni post hoc tests. \**P* < 0.05, \*\**P* < 0.01, \*\*\**P* < 0.001, \*\*\*\**P* < 0.0001.

371 at higher intensities, showing deteriorated acoustic startle reactivity in *Isl1CKO* mice (Fig. 7C-  
372 E).

373 To further assess complex auditory discrimination behavior, we exposed control and  
374 *Isl1CKO* adult mice to a prepulse inhibition (PPI) paradigm, i.e., the inhibition of the ASR  
375 induced by presenting an acoustic stimulus shortly preceding the presentation of an acoustic  
376 stimulus, the startling sound. The circuit mediating a prepulse on the startle reflex involves  
377 central structures of the auditory pathway, including the IC and the auditory cortex<sup>46,47</sup>. We  
378 used either BBN or pure tone pips of 8 and 32 kHz at increasing intensities as a non-startling  
379 acoustic stimulus (prepulse) that preceded the startle stimulus in a quiet background. The PPI  
380 with the prepulse of a pure tone of 32 kHz, which is the well-preserved audible frequency in  
381 *Isl1CKO*, was comparable between control and mutant mice (Fig. 7H). Interestingly, the  
382 prepulse with the pure tone of 8 kHz resulted in a larger inhibition of the startle response in  
383 *Isl1CKO* than in controls (Fig. 7G), despite the significant hearing deficiency at 8 kHz, as  
384 shown by ABR evaluations (Fig. 4). This indicates that the 8-kHz prepulse response was  
385 enhanced in *Isl1CKO* mice, suggesting compensatory neural hyperactivity of the central  
386 auditory system<sup>37,48</sup>. Thus, the ASR and PPI of startle analyses indicate abnormalities of the  
387 acoustic behavior of *Isl1CKO* mutants.  
388

## 389 Discussion

390 Our study shows for the first time that a LIM homeodomain transcription factor ISL1 regulates  
391 neuronal development in the cochlea. Using RNA profiling, morphological, and physiological  
392 analyses, we provide evidence that ISL1 coordinates genetic networks affecting molecular  
393 characteristics of SGNs, their pathfinding abilities, and auditory information processing. The  
394 elimination of *Isl1* in neurons during inner ear development results in migration defect of  
395 SGNs, disorganized innervation in the cochlea, unsegregated and reduced central axons, and  
396 reduced size of the CN. This neuronal phenotype of *Isl1CKO* was accompanied by hearing  
397 impairment, abnormalities in sound processing in the IC, and aberrant auditory behavior.

398 ISL1 is critical for developing multiple tissues, neuronal and non-neuronal cells<sup>49,50</sup>,  
399 <sup>51,52,53</sup>. Different aspects of neuronal development depend on ISL1, including specification of  
400 motoneurons<sup>49</sup>, sensory neurons<sup>22,51</sup>, axonal growth<sup>54</sup>, and axonal pathfinding<sup>55</sup>. During  
401 inner ear development, ISL1 is expressed in both neuronal and sensory precursors<sup>14,16,17,18,56</sup>.  
402 Transgenic modulations of *Isl1* expression indicate important roles of ISL1 in the maintenance  
403 and function of neurons and hair cells and as a possible contributing factor in  
404 neurodegeneration<sup>19,57,58,59</sup>. All these studies suggest that ISL1 plays a role in developing  
405 neurons and sensory cells, but no direct evaluation of ISL1 function has been performed. To  
406 circumvent the pleiotropic effects of *Isl1* in embryonic development, in this study, we used  
407 *Neurod1<sup>Cre</sup>* to delete *Isl1* specifically in the inner ear neurons without affecting the  
408 development of sensory cells.

409 We established that ISL1 is necessary for neuronal differentiation programs in the  
410 cochlea and the functional properties of the auditory system. Our RNA profiling of SGNs  
411 demonstrated transcriptome changes induced by a loss of *Isl1* affecting molecular  
412 characteristics of neurons and pathfinding abilities, including neurotransmission, structure of  
413 synapses, neuron migration, axonogenesis, and expression of crucial guidance molecules  
414 (neurotrophic tyrosine kinase receptors, *Ntrk2* and *Ntrk3*). Consistent with a central role of  
415 ISL1 in sensory neuron developmental programs<sup>22</sup>, regulatory networks of signaling molecules  
416 and transcription factors were affected in *Isl1CKO* neurons, such as proneural bHLH factors  
417 (members of NeuroD, Olig, and Nscl families), LIM-only (*Lmo2*, *Lmo3*) and LIM  
418 homeodomain transcription factors (*Lhx1*, *Lhx2*, *Isl2*), transcription activation complexes for  
419 coordination of particular differentiation programs represented by Eyes absent (*Eya4* and  
420 *Eya2*) and Sine oculis (*Six2*) proteins, *Pou3f2* and *Pou4f2* of the family of POU homeodomain



421 trans-regulatory factors, and FGF signaling molecules (*Fgf10*, *Fgf11*, *Fgf13*, *Fgf14*) and their  
422 downstream Etv transcription factor targets (*Etv1*, *Etv4*, *Etv5*). Interestingly, transcription  
423 factor *Gata3* was downregulated, suggesting that ISL1 is upstream of the *Gata3* transcriptional  
424 network differentiation program<sup>10</sup>. Thus, ISL1 orchestrates a complex gene regulatory network  
425 driving multiple aspects of differentiation of neurons in the cochlea and defining neuronal  
426 features.

427 The most striking morphological features of the neuronal phenotype of *Isl1CKO* are the  
428 dysregulated migration and pathfinding of SGNs. A similar migration deficit was reported for  
429 *ErbB2* null mutants<sup>60</sup>; however, the interpretation of findings is compounded by direct inner  
430 ear effects and effects associated with neural crest-derived Schwann cells. Additionally,  
431 conditional deletion of *Sox10* produced by *Wnt1<sup>Cre</sup>* resulted in abnormal migration of SGNs  
432 similar to the *Isl1CKO* phenotype<sup>61</sup>. Migration defects of SGNs in both *ErbB2*<sup>60</sup> and *Sox10*  
433 mutants<sup>61</sup> were attributed to the complete absence of Schwann cells in the entire inner ear  
434 ganglion. However, in our *Isl1CKO* mutant, SOX10 positive Schwann cells were found in a  
435 similar density in the spiral ganglion of both mutant and control mice (Additional File Fig.  
436 S2C', D'), thus excluding any direct involvement of glial cells in the migration defects of *Isl1*-  
437 deficient neurons. Curiously, more profound disorganization of peripheral processes in the  
438 cochlea than defects found in *Isl1CKO* or both *ErbB2* null<sup>60</sup> and *Sox10* mutants<sup>61</sup> was reported  
439 for delayed conditional deletion of *Gata3* in SGNs<sup>10</sup>. Despite severe disorganization of  
440 cochlear wiring of the *Gata3* conditional deletion mutant, central projections maintained their  
441 overall tonotopic organization within the auditory nerve and the CN<sup>9,10</sup>. In contrast, we provide  
442 compelling evidence that elimination of *Isl1* in SGNs affected the pathfinding abilities of  
443 neurons in the cochlea not only to form peripheral processes but also to establish central  
444 projections. Such profound disorganization of peripheral and central projections is known for  
445 *Neurod1* mutations<sup>13,14,15</sup>. Deletions of *Neurod1* result in miswired, and reduced SGNs, and  
446 loss of tonotopy<sup>13,15</sup>. Somewhat similar disorganization of central axons with unsegregated  
447 auditory nerve fibers, reduced the size of the CN, and missing tonotopic organization of  
448 synapsing branches in the CN subdivisions was found in our *Isl1CKO*. Although both  
449 *Neurod1CKO* and *Isl1CKO* demonstrated a significant hearing loss, in contrast to the reduced  
450 sound frequency range of *Neurod1CKO*<sup>15</sup>, responses for the entire measured frequency range  
451 were detected in *Isl1CKO*. The processing of high acoustic frequencies was broadly  
452 comparable between age-matched controls and *Isl1CKO*, indicating some preservation of  
453 peripheral neuronal activity. Accordingly, these most preserved high-frequency basal  
454 responses correspond to the most close-to-normal distribution of sensory neurons in the  
455 cochlear base in *Isl1CKO* mice (Fig. 1).

456 Nevertheless, as a result of disorganized primary auditory neurons with derailed central  
457 projections, the characteristics of persistent auditory function in the IC were altered with  
458 worsened tuning capabilities of IC units and their increased spontaneous activity and threshold  
459 elevations and decreased dynamic range. The peripheral deficit in sound encoding results in  
460 abnormal auditory behavior of *Isl1CKO*. Although no significant differences of ABR  
461 thresholds at 32 kHz were observed between *Isl1CKO* and control mice, indicating retained  
462 hearing function, the startle reactions of *Isl1CKO* at 32 kHz were reduced. Plasticity of the  
463 startle response is also evident in the PPI responses of *Isl1CKO* mice, in which a weak  
464 prestimulus suppresses the response to a subsequent startling stimulus. *Isl1CKO* mice  
465 demonstrated PPI impairment for the pure tone of 8 kHz, reflecting abnormal sensorimotor  
466 gating due to compensatory hyperactivity of the central auditory system<sup>48,62</sup>.

467 Additionally, compared to control mice, DPOAE responses of *Isl1CKO* were reduced,  
468 indicating dysfunction of cochlear amplification. The OHCs of the organ of Corti play a central  
469 role in the active enhancement of sound-induced vibration. For a given OHCs, amplification  
470 only occurs at a precise frequency, and thus, this mechanism provides a sharpening of the

471 tuning curve and improves frequency selectivity<sup>63</sup>. Nevertheless, DPOAE analysis showed  
472 that some function was preserved in high-frequency OHCs in the *Isl1CKO* cochlea.  
473 Frequencies above 28 kHz are located at the basal half of the mouse cochlea from the mid-base  
474 to the basal end<sup>35</sup>, which correspond to the most preserved distribution of sensory neurons in  
475 the area of the spiral ganglion in the cochlear base of *Isl1CKO* mice (Fig. 1H). Usually,  
476 decreased DPOAE amplitudes indicate loss and dysfunction of OHCs<sup>57, 63, 64, 65</sup>. Since  
477 *Neurod1<sup>Cre</sup>* is not expressed in sensory cells in the cochlea, it is unlikely that the development  
478 of OHCs is directly affected in *Isl1CKO*. Instead, cochlear amplification deficits in *Isl1CKO*  
479 correlated with the reduced and disorganized innervation of OHCs, as shown in Fig. 1. The  
480 medial olivocochlear efferents innervate OHCs from the brainstem, representing a sound-  
481 evoked negative feedback loop suppressing OHC activity<sup>66</sup>. Besides efferents, OHCs are  
482 innervated by the type II SGNs<sup>67, 68</sup>. Although the function of type II SGNs remains obscure,  
483 it is clear that these neurons are involved in auditory nociception<sup>69</sup>, and may also constitute  
484 the sensory drive for the olivocochlear efferent reflex<sup>70</sup> that is disputed<sup>71</sup>. As *Isl1* is expressed  
485 in both type I and type II SGNs during inner ear development<sup>20</sup>, characteristics of both  
486 neuronal types might likely be affected in *Isl1CKO*.

487 An additional morphological change likely contributing to the hearing deficit of  
488 *Isl1CKO* is a shortened cochlea. Somewhat similar phenotypes of a shortened cochlea were  
489 previously reported for deletion mutants of *Neurod1* and *Neurog1*, key transcription factors for  
490 inner ear neuronal development<sup>8, 14, 15, 72</sup>. A comparable effect of cochlear length reduction  
491 was observed following the loss of *Foxg1*<sup>73</sup> and *Lmx1a*<sup>74, 75</sup>. Although mechanisms affecting  
492 the cochlear extension are unknown, it is clear that this confounding feature of the *Isl1CKO*  
493 phenotype would consequently impact mechanical and neural tuning from the base to the apex  
494 of the cochlea and the ability to perform time-frequency processing of sound.

495

## 496 **Conclusions**

497 Our study provides compelling evidence that ISL1 is a critical regulator of SGN development,  
498 affecting neuronal migration, pathfinding abilities to form cochlear wiring, and central axonal  
499 projections. As such, ISL1 represents an essential factor in the regulation of neuronal  
500 differentiation to produce functional neurons in cell-based therapies and stem cell engineering  
501<sup>76, 77</sup>. Additionally, this unique model contributes to our understanding of how disorganization  
502 of the neuronal periphery affects information processing at higher centers of the central  
503 auditory pathway at the physiological and behavioral levels. ISL1 is a LIM-homeodomain  
504 transcription factor with a specific potential to interact and recruit other co-factors to form  
505 higher-order regulatory complexes<sup>78</sup>. In the future, it will be intriguing to fully identify the  
506 molecular mechanisms and co-regulators underlying ISL1 function in SGNs.

507

## 508 **Methods**

509

### 510 **Experimental animals**

511 All methods were performed according to the Guide for the Care and Use of Laboratory  
512 Animals (National Research Council. Washington, DC. The National Academies Press, 1996).  
513 The design of experiments was approved by the Animal Care and Use Committee of the  
514 Institute of Molecular Genetics, Czech Academy of Sciences. The mice were housed in 12-  
515 hour light/dark cycles and were fed *ad libitum*. To generate *Isl1CKO* (the genotype  
516 *Neurod1<sup>Cre</sup>;Isl1<sup>loxP/loxP</sup>*), we cross-bred floxed *Isl1* (*Isl1<sup>loxP/loxP</sup>*; *Isl1<sup>tm2Sev/J</sup>*, # 028501, Jackson  
517 Laboratory)<sup>22</sup> and *Neurod1<sup>Cre</sup>* transgenic mice (Tg(*Neurod1-cre*)1Able/J, # 028364, Jackson  
518 Laboratory), which were generated by pronuclear injection of the *Neurod1-cre* BAC construct  
519 that carries Cre-sequence downstream of the translational initiation codon ATG of the *Neurod1*  
520 gene<sup>21</sup>. Heterozygous animals, *Neurod1<sup>Cre</sup>;Isl1<sup>+/loxP</sup>* were viable, born in appropriate

521 Mendelian ratios, and were phenotypically indistinguishable from control (Cre negative)  
522 littermate mice. As control mice, we used mice with the genotype Cre negative, *Isl1<sup>loxP/loxP</sup>* and  
523 *Isl1<sup>+/loxP</sup>*. The mouse line *Neurod1<sup>Cre</sup>* was also bred with Cre-reporter tdTomato line  
524 (*TomatoAi14*, B6.Cg-*Gt(ROSA)26Sor<sup>tm14(CAG-tdTomato)Hze</sup>*, # 7914 Jackson Laboratory). PCR  
525 performed genotyping on tail DNA. We used both males and females for experiments. Lines  
526 are a mixed C57BL/6/sv129 background. Phenotyping and data analysis was performed blind  
527 to the genotype of the mice.

528

### 529 **Morphological evaluation of the cochlea, cochlear nucleus, and inferior colliculus**

530 Dissected ears were fixed in 4% paraformaldehyde (PFA) in PBS. For vibratome sections,  
531 samples were embedded in 4% agarose and sectioned at 80  $\mu\text{m}$  using a Leica VT1000S  
532 vibratome. Vibratome sections, whole inner ears, or whole embryos were defatted in 70%  
533 ethanol and then rehydrated and blocked with serum, as described previously<sup>16, 58</sup>. Samples  
534 were then incubated with primary antibodies at 4°C for 72 hours. The primary antibodies used  
535 were: rabbit anti-Myosin 7a (Myo7a; Proteus BioSciences 25-6790, 1:500), mouse anti-  
536 acetylated  $\alpha$ -tubulin (tubulin; Sigma-Aldrich T6793, 1:400), rabbit anti-calretinin (Santa Cruz  
537 Biotechnology sc-50453, 1:100), rabbit anti-parvalbumin (Abcam ab11427, 1:2000), mouse  
538 anti-VGLUT1 (Merck MAB5502, 1:200), rabbit anti-NeuN (Abcam ab177487, 1:500), goat  
539 anti-prestin (Santa Cruz Biotechnology sc-22692, 1:50), mouse anti-*Isl1* (Developmental  
540 Hybridoma Bank 39.3F7, 1:130), goat anti-*Neurod1* (Santa Cruz Biotechnology sc-1084,  
541 1:100), and rabbit anti-*Sox10* (Abcam ab155279, 1:250). After several PBS washes, secondary  
542 antibodies were added and incubated at 4°C for 24 hours. The secondary antibodies Alexa  
543 Fluor® 488 AffiniPure Goat Anti-Mouse IgG (Jackson ImmunoResearch Laboratories 115-  
544 545-146), Alexa Fluor® 594 AffiniPure Goat Anti-Rabbit IgG (Jackson ImmunoResearch  
545 Laboratories 111-585-144), and DyLight488-conjugated AffiniPure Mouse Anti-Goat IgG  
546 (Jackson ImmunoResearch Laboratories 205-485-108) were used in 1:400 dilution. Nuclei  
547 were stained by Hoechst 33258 (Sigma-Aldrich 861405, 1:2000). Samples were mounted in  
548 Aqua-Poly/Mount (Polysciences 18606) or prepared Antifade medium, and images were taken  
549 on Zeiss LSM 880 confocal microscope. ImageJ and ZEN software was used for image  
550 processing.

551 The length of the organ of Corti was measured using the "Measure line" ImageJ plugin.  
552 The CN and inferior colliculus volumes were established by analyzing parallel, serial equally  
553 spaced 80  $\mu\text{m}$  coronal vibratome sections through the brain ( $n = 5$  *Isl1CKO* and  $n = 5$  control  
554 mice). The left and right cochlear nucleus and inferior colliculus areas were determined in each  
555 section using ImageJ, and the volume of the organs was calculated. Volumes of paired organs  
556 were adjusted to the body weight. Whole-mount anti-tubulin labeling of the cochlea was used  
557 to measure the length and density of the radial fibers. The evaluation of the innervation was  
558 done separately for each part of the cochlea: the apex, mid-apex, mid-base, and base. Due to  
559 the disorganization of innervation in the apex, we only evaluated the fiber density in the  
560 cochlea's base, mid-base, and mid-apex parts. The density of the radial fibers was expressed as  
561 the percentage of a positive area in the measured area of 152 x 66  $\mu\text{m}^2$  using the "Threshold"  
562 function ImageJ. The length of the radial fibers was measured from the whole-mount anti-  
563 tubulin and Myo7a immunolabeled cochlea confocal images. For each genotype, we measured  
564 3 samples, and in each part of the cochlea, we measured the length of the fibers in 3 radial fiber  
565 bundles from the IHCs to the IGSB. To compare how many neurons are correctly located in  
566 the area of the Rosenthal's canal in *Isl1CKO*, we used NeuN immunolabeled whole-mount  
567 cochlea. We measured the corresponding region of the spiral ganglion-containing neurons  
568 using the "Threshold" function ImageJ. We used 5 samples per genotype.

569

### 570 **Isolation of genetically labeled neurons and library construction**

571 Spiral ganglia were micro-dissected in Dulbecco's PBS on ice from E14.5 embryos of either  
572 sex from four litters; spiral ganglia from both inner ears of the individual embryo per sample.  
573 Spiral ganglia were incubated in 300  $\mu$ l of lysis solution (0.05% trypsin, 0.53mM EDTA  
574 Dulbecco's PBS) in 37 °C, shaking at 900 RPM for 5 min. The lysis was stopped by adding  
575 600  $\mu$ l of FACS buffer (Dulbecco's PBS, 10mM EGTA, and 2% FBS). After spinning down  
576 the samples at 800 G, 4 °C for 10 min, the supernatant was removed, and cell pellets were  
577 resuspended in 500  $\mu$ l of ice-cold FACS buffer. Immediately before sorting, cells were  
578 passed through a 50  $\mu$ m cell sieve (CellTrics<sup>TM</sup>, Sysmex America Inc.) into a sterile 5 ml  
579 polystyrene round-bottom falcon to remove clusters of cells and kept on ice. TdTomato<sup>+</sup>  
580 neurons were sorted using a flow cytometer (BD FACSAria<sup>TM</sup> Fusion), through a 100  $\mu$ m  
581 nozzle in 20 psi, operated with BD FACSDiva<sup>TM</sup> Software. 100 sorted cells were collected  
582 into individual wells of 96-well plate containing 5  $\mu$ l of lysis buffer of NEB Next single-cell  
583 low input RNA library prep kit for Illumina (#E6420 New England Biolabs). Plates were  
584 frozen immediately on dry ice and stored at -80 °C. The total time from euthanasia to cell  
585 collection was ~3 hrs.

586 RNAseq-libraries were prepared from 6 samples per each genotype, control  
587 (*Neurod1<sup>Cre</sup>; TomatoAi14*) and *Isl1CKO* mutant (*Isl1CKO; TomatoAi14*), and each sample  
588 contained 100 tdTomato<sup>+</sup> neurons. Following the manufacturer's instructions, the NEB Next  
589 single-cell low input RNA library prep kit for Illumina was used for cDNA synthesis,  
590 amplification, and library generation<sup>79</sup> at the Gene Core Facility (Institute of Biotechnology  
591 CAS, Czechia). Fragment Analyzer assessed the quality of cDNA libraries. The libraries  
592 were sequenced on an Illumina NextSeq 500 next-generation sequencer. NextSeq 500/550  
593 High Output kit 75 cycles (# 200024906, Illumina) were processed at the Genomics and  
594 Bioinformatics Core Facility (Institute of Molecular Genetics CAS, Czechia).

#### 596 **Computational analysis of RNAseq data**

597 RNA-Seq reads in FASTQ files were mapped to the mouse genome using STAR [version  
598 2.7.0c<sup>80</sup>] version GRCm38 primary assembly and annotation version M8. The raw data of  
599 RNA sequencing were processed with a standard pipeline. Using cutadapt v1.18<sup>81</sup>, the  
600 number of reads (minimum, 32 million; maximum, 73 million) was trimmed by Illumina  
601 sequencing adaptor and of bases with read quality lower than 20, subsequently reads shorter  
602 than 20 bp were filtered out. TrimmomaticPE version 0.36<sup>82</sup>. Ribosomal RNA and reads  
603 mapping to UniVec database were filtered out using bowtie v1.2.2. with parameters -S -n 1  
604 and SortMeRNA<sup>83</sup>. A count table was generated by Rsubread v2.0.1 package using default  
605 parameters without counting multimapping reads. The raw RNAseq data were deposited at  
606 GEO: # GSE182575 study (<https://www.ncbi.nlm.nih.gov/geo/query/acc.cgi?acc=GSE182575>).  
607 DESeq2 [v1.26.0<sup>84</sup>] default parameters were used to normalize data and compare the  
608 different groups. Differentially expressed genes were identified based on an adjusted P-value  
609  $p_{adj} < 0.05$ ,  $FC > 2$ , and a base mean  $\geq 50$  was applied to identify differentially expressed  
610 genes between *Isl1CKO* mutant and control neurons. The functional annotation of the  
611 differentially expressed genes was performed using GOTermFinder<sup>85</sup>.

612 *Enrichment mapping.* The enrichment of the functional categories and functional annotation  
613 clustering of the differentially expressed genes were performed using g: Profiler<sup>86</sup> input using  
614 version e104\_eg51\_p15\_3922dba with g: SCS multiple testing correction methods applying  
615 significance threshold of 0.05, while no electronic GO annotations were used. Only Biological  
616 Processes (BP) data underwent further processing. Complete query details are available in  
617 Query info tabs in Additional Supplementary file 2, Table S2, S3. The resulting GEM and  
618 combined GMT files were loaded into Cytoscape<sup>87</sup> plugin "EnrichmentMap"<sup>88</sup> using 0.01  
619 FDR q-value cutoff to generate a network. Edge cutoff was set to 0.6, and nodes were filtered  
620 by  $gs\_size < 1800$ . Five GO terms forming solitary nodes, or a pair of nodes, were excluded

621 (listed in Additional Supplementary file 2, Table S2, S3). Further adjustments were made in  
622 yFiles Layout Algorithms, Legend Creator (Cytoscape plugins), and Inkscape (Inkscape  
623 Project, 2020).

624

### 625 **Quantitative real-time PCR**

626 Total RNA was isolated from both inner ears of the embryo at E14.5 using TRI Reagent  
627 (Sigma-Aldrich T9424). We used 8 embryos for *Isl1CKO* and 7 embryos for the control group  
628 from three litters. RNA from both inner ears of one embryo represented one sample. RNA  
629 samples (1  $\mu$ g) were processed and analyzed as previously described<sup>58</sup>. Briefly, following RT,  
630 quantitative qPCR was performed with initial activation at 95 °C for 120 s, followed by 40  
631 cycles at 95 °C for 15 s, 60 °C for 30 s, and 72 °C for 30 s using the CFX384™ Real-Time  
632 PCR Detection System (Bio-Rad Laboratories). The primer sequences  
633 ([pga.mgh.harvard.edu/primerbank/](http://pga.mgh.harvard.edu/primerbank/)) are listed in Additional Supplementary file 2, Table S4.  
634 Relative mRNA expression was calculated using the  $-\Delta\Delta C_q$  method with *Hprt1* as a reference  
635 gene. GraphPad Prism software was used for statistical analysis.

636

### 637 **Lipophilic Dye Tracing**

638 We studied the innervation pattern in whole or dissected ears using lipophilic dye tracing in  
639 aldehyde-fixed tissues as previously described<sup>89</sup>. At least three mutants and similar numbers  
640 of control littermates of both sexes were used for each evaluation. Filter strips loaded with  
641 colored lipophilic dyes were inserted into the cochlear apex, base, and vestibular end-organ  
642 utricle<sup>90</sup>. After allowing appropriate time for diffusion of the lipophilic tracer (between 48-  
643 120 hours), we prepared the ears as whole mounts in glycerol on a glass slide, using appropriate  
644 spacers to avoid distortion, and imaged them using a Leica SP8 confocal microscope. Images  
645 were compiled into plates to show the most pertinent details using Corel Draw. Only general  
646 image modifications such as contrast or brightness adjustments were used to enhance the visual  
647 appeal without affecting the scientific content.

648

### 649 **Hearing function evaluation**

650 Auditory brainstem response (ABR) and distortion product otoacoustic emissions (DPOAEs)  
651 tests were carried out on mice under general anesthesia with 35 mg/kg ketamine (Calypso 50  
652 mg/ml) and 6 mg/kg xylazine (Xylapan 20 mg/ml) in saline to give an application volume of 7  
653 ml/kg body weight via subcutaneous injection, maintained on a temperature-regulated blanket  
654 in a soundproof room.

655 *Distortion product otoacoustic emissions.* For DPOAE recording were tested *Isl1CKO* (n = 10)  
656 and control mice (n = 14). Cubic (2 F1–F2) distortion product otoacoustic emissions over an  
657 F2 frequency range from 6 to 38 kHz were recorded with a low-noise microphone system  
658 (Etymotic probe ER-10B+, Etymotic Research). Acoustic stimuli (ratio F2/F1 = 1.21, F1 and  
659 F2 primary tone levels of L1/L2 = 70/60 dB) were presented to the ear canal with two custom-  
660 made piezoelectric stimulators connected to the probe with 10-cm-long silastic tubes. The  
661 signal from the microphone was analyzed by the TDT System III (RP2 processor, sampling  
662 rate 100 kHz) using custom-made MATLAB software. DPOAEs were recorded in the animals'  
663 ears at individual frequencies over the frequency range 4–38 kHz with a resolution of ten points  
664 per octave. All the experiments and analyses were done with no information on the genotype.

665 *Auditory brainstem response.* For auditory brainstem response (ABR) recording (n = 7  
666 *Isl1CKO* and n = 10 control mice), an active electrode was placed subcutaneously on the vertex  
667 and ground and reference electrodes in the neck muscles. Responses to tone bursts (3 ms  
668 duration, 1 ms rise/fall times, frequencies of 2, 4, 8, 16, 32, and 40 kHz) and clicks of different  
669 intensity were recorded. Acoustic stimuli were conveyed to the animal in free-field conditions  
670 via a two-way loudspeaker system (Selenium 6W4P woofer and RAAL70-20 tweeter) placed

671 70 cm in front of the animal's head. The signal was processed with a TDT System III Pentusa  
672 Base Station and analyzed using BioSig™ software. The response threshold to each frequency  
673 was determined as the minimal tone intensity that still evoked a noticeable potential peak in  
674 the expected time window of the recorded signal. The amplitude and latency of ABR peaks I-  
675 V were determined using BioSig software (Tucker Davis Technologies). Central compensation  
676 of neuronal responsiveness (central gain) was calculated using ABR wave IV to I amplitudes.  
677

### 678 **Extracellular recording of the neuronal activity in the inferior colliculus (IC)**

679 For extracellular recording in the IC, we evaluated *Isl1CKO* (n = 8) and control mice (n = 12).  
680 The surgery and extracellular recording in the IC were performed in mice anesthetized with 35  
681 mg/kg ketamine (Calypsol 50 mg/ml) and 6 mg/kg xylazine (Xylapan 20 mg/ml) in saline via  
682 subcutaneous injection. Approximately every hour, supplement subcutaneous injections of  
683 one-half of the original dose of the anesthetics were administered to keep a sufficient level of  
684 anesthesia, judged by a positive pedal and palpebral (toe-pinch) reflex and movement of the  
685 whiskers. Respiratory rate, and heart rate, were monitored. An incision was made through the  
686 skull's skin for access to the IC, and underlying muscles were retracted to expose the dorsal  
687 skull. A holder was glued to the skull, and small holes were drilled over both ICs. Neuronal  
688 activity (multiple units) in the IC was recorded using a 16-channel, single shank probe  
689 (NeuroNexus Technologies) with 50 or 100  $\mu\text{m}$  between the electrode spots. The obtained  
690 signal from the electrode was amplified 10000 times, band-pass filtered over the range of 300  
691 Hz to 10 kHz and processed by a TDT System III (Tucker Davis Technologies) using an RX5-  
692 2 Pentusa Base Station. Individual spikes from the recorded signal were isolated online based  
693 on amplitude discrimination and analyzed with BrainWare software (v. 8.12, Jan Schnupp,  
694 Oxford University). Subsequent discrimination of spikes from the recorded data and their  
695 sorting according to the amplitudes of the first positive and negative peaks were performed off-  
696 line and was used to sort action potentials (spikes) among single units. The recorded data were  
697 processed and analyzed using custom software based on MATLAB. The stimulation signals  
698 were generated using a TDT System III with the RP 2.1 Enhanced Real-Time Processor.  
699 Acoustic stimuli were delivered in free-field conditions via a two-driver loudspeaker system  
700 (Selenium 6W4P woofer and RAAL70-20 tweeter) placed 70 cm in front of the animal's head.  
701 *Frequency-intensity mapping*: To determine the neuronal receptive fields, pure tones  
702 (frequency 2 - 40 kHz with 1/8 octave step, 60 ms duration, 5 ms rise/fall times, various  
703 intensity with 5dB step) were presented in a random order, each stimulus appearing three times.  
704 A discrete matrix corresponding to the response magnitude evoked by each of the frequency-  
705 intensity combinations was thereby obtained, smoothed using cubic spline interpolation, and  
706 used for extraction of the basic parameters: the excitatory response threshold (the lowest  
707 stimulus intensity that excited the neuron, measured in dB SPL), the characteristic frequency  
708 (CF) – the frequency with the minimal response threshold, measured in Hz, and the bandwidth  
709 of the excitatory area 20 dB above the excitatory threshold, expressed by quality factor Q ( $Q =$   
710  $CF/\text{bandwidth}$ ).

711 *Rate intensity function of the IC neurons*: Neuronal responses to broadband noise (BBN) bursts  
712 of variable intensity (10 dB steps, 50 repetitions) were used to construct the rate intensity  
713 function (RIF). A 100% scale was assigned to the neuron's total range of response amplitudes,  
714 0% corresponding to spontaneous activity and 100% corresponding to its maximum response  
715 magnitude<sup>91</sup>. The two points of interest are R10 and R90, which correspond to 10 and 90% of  
716 this scale, respectively. R10, describing the starting point of the RIF's rise, was taken as the  
717 BBN response threshold. RIFs were further used for evaluating the following parameters: the  
718 dynamic range (DR) of the RIF:  $DR = S90 - S10$ ; and the maximum response magnitude.  
719 Spontaneous activity of the IC neurons was determined at the 0dB SPL BBN stimulation.

720 *Temporal properties of the IC neurons:* We used trains of five clicks at an intensity of 70 dB  
721 SPL for control and 80 dB SPL for *Isl1CKO* mice with various inter-click intervals (100, 50,  
722 30, 20, and 15 ms). We calculated the vector strength (VS) values and the Rayleigh statistics  
723 for each spike pattern; only responses with at least 5.991 were significantly considered phase-  
724 locking (Zhou and Merzenich, 2008). The VS quantifies how well the individual spikes are  
725 synchronized (phase-locked) with a periodic signal.

726

### 727 **Behavioral tests**

728 *Isl1CKO* (n = 10) and control (n = 7) mice were used at 2-3 months of age. All behavioral tests  
729 were performed in a sound-attenuated chamber (Coulbourn Habitest, model E10-21) located  
730 in a soundproof room. Each mouse was placed in a wire mesh cage on a motion-sensitive  
731 platform inside the box during the testing. The mouse's reflex movements to sound stimuli  
732 were detected and transformed to a voltage signal by the load-cell response sensing platform.  
733 An amplified voltage signal was acquired and processed using a TDT system 3 with a Real-  
734 Time Processor RP 2 (Tucker Davis Technologies, Alachua, FL) and custom-made software in  
735 a Matlab environment. The startle responses were evaluated in 100 ms windows, beginning at  
736 the onset of the startling stimulus. The magnitude of the response was measured as the maximal  
737 peak-to-peak amplitude of transient voltage occurring in the response window. Acoustic  
738 stimuli were generated by the TDT system (Real-Time Processor RP 2), amplified and  
739 presented via a loudspeaker (SEAS, 29AF/W), and placed inside the chamber above the animal.  
740 Stimulus presentation and data acquisition were controlled by a custom-made application in a  
741 Matlab environment. Calibration of the apparatus was performed for frequencies between 4  
742 kHz and 32 kHz by a 1/4-inch Brüel & Kjaer 4939 microphone connected to a Brüel & Kjaer  
743 ZC 0020 preamplifier and a B&K 2231 sound level meter. During the calibration, the  
744 calibrating microphone was positioned at the animal's head in the test cage.

745 *Acoustic startle reflex (ASR)* (a transient motor response to an intense, unexpected stimulus)  
746 was used to indicate the behavioral responsiveness to sound stimuli. The ASRs to 8, 16, and  
747 32 kHz tone pips and BBN bursts (50 ms duration, 3 ms rise/fall times, varying intensity levels)  
748 were recorded. Each test session contained: a baseline trial (-10 dB SPL stimulus intensity)  
749 and 13 startle stimuli of different intensities (50, 55, 60, 65, 70, 75, 80, 85, 90, 100, 110, 115,  
750 and 120-dB SPL). The inter-trial interval varied from 15 to 50 s.

751 In the *prepulse inhibition (PPI)* procedure, 3 different trial types were used: a baseline trial  
752 without any stimulus, an acoustic startle pulse alone (white noise at 110 dB SPL, 50 ms, 3 ms  
753 rise/fall times), and a combination of the prepulse and startle pulse. The inter-stimulus interval  
754 between the prepulse and the startle stimulus was set to 50 ms; each trial type was presented  
755 three times. The inter-trial gap was randomized and varied from 15 to 50 s. The efficacy of the  
756 PPI of ASR was expressed as an ASR ratio in percentage, e.g., 100% corresponds to the  
757 amplitude of ASR without prepulse; smaller values of ASR ratio indicate stronger PPI. As a  
758 prepulse, we used either BBN bursts or tone pips (50 ms duration, 3 ms rise/fall time) at  
759 frequencies of 8 and 32 kHz at increasing intensities. It is expected that in the presence of  
760 prepulse, the amplitude of the following startle response decreases.

761

### 762 **Experimental design and statistical analyses**

763 All comparisons were made between animals with the same genetic background, typically  
764 littermates, and we used both male and female mice. The number of samples (n) for each  
765 comparison can be found in the individual method descriptions and are given in the  
766 corresponding figures. Phenotyping and data analysis was performed blind to the genotype of  
767 the mice. All values are presented either as the mean  $\pm$  standard deviation (SD) or standard  
768 error of the mean (SEM). For statistical analysis, GraphPad Prism software was used. To assess  
769 differences in the mean, one-way or two-way ANOVA with Bonferroni's multiple comparison

770 test, multiple *t*-tests with Holm-Sidak comparison method, and unpaired two-tailed *t*-tests were  
771 employed. Significance was determined as  $P < 0.05$  (\*),  $P < 0.01$  (\*\*),  $P < 0.001$  (\*\*\*) or  $P <$   
772  $0.0001$  (\*\*\*\*). Complete results of the statistical analyses are included in the figure legends.  
773

#### 774 Ethics approval and consent to participate

775 Experiments were carried out following the animal welfare guidelines 2010/63/EC of the  
776 European Communities Council Directive, agreeing with the Guide for the Care and Use of  
777 Laboratory Animals (National Research Council. Washington, DC. The National Academies  
778 Press, 1996). The design of experiments was approved by the Animal Care and Use Committee  
779 of the Institute of Molecular Genetics, Czech Academy of Sciences (protocol # 104/2019).  
780

#### 781 Consent for publication

782 Not applicable.  
783

#### 784 Data availability

785 All data generated or analyzed during this study are included in this published article, its  
786 Additional Supplementary Files 1, 2, and in the publicly available Gene Expression Omnibus  
787 (GEO) repository.  
788

#### 789 Competing interests

790 The authors declare that they have no competing interests.  
791

#### 792 Funding

793 This research was supported by the Czech Science Foundation (20-06927S to GP), by the  
794 institutional support of the Czech Academy of Sciences (RVO: 86652036 to GP), and  
795 NIH/NIA (R01 AG060504, DC016099, AG051443 to BF and ENY).  
796

#### 797 Authors' contributions

798 GP, JS, BF designed and supervised the experiments. IF, KP, RB, MT, SV, MD, and BF  
799 performed experiments and analyzed the data. OS, SB, and LV carried RNAseq analyses. IF  
800 and KP prepared the first draft of the manuscript. GP and BF wrote the manuscript, ENY and  
801 JS reviewed the manuscript. All authors read and approved the final manuscript.  
802

#### 803 Acknowledgments

804 A. Pavlinek (King's College London) for editing the MS. We acknowledge Imaging Methods  
805 Core Facility at BIOCEV supported by the MEYS CR (Large RI Project LM2018129 Czech-  
806 BioImaging) and ERDF (project No. CZ.02.1.01/0.0/0.0/18\_046/0016045) for its support  
807 with obtaining imaging data presented in this paper and FACS experiments, and Biocev  
808 GeneCore Facility for its support with gene expression/transcriptome analyses.  
809

#### 810 References

- 811 1. Muniak MA, Connelly CJ, Suthakar K, Milinkeviciute G, Ayeni FE, Ryugo DK. Central  
812 Projections of Spiral Ganglion Neurons. In: *The Primary Auditory Neurons of the Mammalian*  
813 *Cochlea*. Springer (2016).
- 814 2. Rubel EW, Fritsch B. Auditory system development: primary auditory neurons and their  
815 targets. *Annu Rev Neurosci* **25**, 51-101 (2002).  
816

817



- 818 3. Kandler K, Clause A, Noh J. Tonotopic reorganization of developing auditory brainstem  
819 circuits. *Nat Neurosci* **12**, 711-717 (2009).
- 820  
821 4. Di Bonito M, Studer M. Cellular and Molecular Underpinnings of Neuronal Assembly in the  
822 Central Auditory System during Mouse Development. *Front Neural Circuits* **11**, 18 (2017).
- 823  
824 5. Lopez-Poveda EA. Olivocochlear Efferents in Animals and Humans: From Anatomy to Clinical  
825 Relevance. *Front Neurol* **9**, 197 (2018).
- 826  
827 6. Fritzscht B, Elliott KL. Evolution and Development of the Inner Ear Efferent System:  
828 Transforming a Motor Neuron Population to Connect to the Most Unusual Motor Protein via  
829 Ancient Nicotinic Receptors. *Front Cell Neurosci* **11**, 114 (2017).
- 830  
831 7. Ma Q, Anderson DJ, Fritzscht B. Neurogenin 1 null mutant ears develop fewer,  
832 morphologically normal hair cells in smaller sensory epithelia devoid of innervation. *J Assoc*  
833 *Res Otolaryngol* **1**, 129-143 (2000).
- 834  
835 8. Kim W-Y, *et al.* NeuroD-null mice are deaf due to a severe loss of the inner ear sensory  
836 neurons during development. *Development* **128**, 417-426 (2001).
- 837  
838 9. Duncan JS, Fritzscht B. Continued expression of GATA3 is necessary for cochlear  
839 neurosensory development. *PLoS one* **8**, e62046 (2013).
- 840  
841 10. Appler JM, Lu CC, Druckenbrod NR, Yu WM, Koundakjian EJ, Goodrich LV. Gata3 is a critical  
842 regulator of cochlear wiring. *J Neurosci* **33**, 3679-3691 (2013).
- 843  
844 11. Huang EJ, Liu W, Fritzscht B, Bianchi LM, Reichardt LF, Xiang M. Brn3a is a transcriptional  
845 regulator of soma size, target field innervation and axon pathfinding of inner ear sensory  
846 neurons. *Development* **128**, 2421-2432 (2001).
- 847  
848 12. Liu M, *et al.* Essential role of BETA2/NeuroD1 in development of the vestibular and auditory  
849 systems. *Genes & development* **14**, 2839-2854 (2000).
- 850  
851 13. Jahan I, Kersigo J, Pan N, Fritzscht B. Neurod1 regulates survival and formation of connections  
852 in mouse ear and brain. *Cell Tissue Res* **341**, 95-110 (2010).
- 853  
854 14. Filova I, *et al.* Combined Atoh1 and Neurod1 Deletion Reveals Autonomous Growth of  
855 Auditory Nerve Fibers. *Mol Neurobiol* **57**, 5307-5323 (2020).
- 856  
857 15. Macova I, *et al.* Neurod1 Is Essential for the Primary Tonotopic Organization and Related  
858 Auditory Information Processing in the Midbrain. *J Neurosci* **39**, 984-1004 (2019).
- 859  
860 16. Dvorakova M, *et al.* Incomplete and delayed Sox2 deletion defines residual ear neurosensory  
861 development and maintenance. *Sci Rep* **6**, 38253 (2016).

- 862  
863 17. Radde-Gallwitz K, Pan L, Gan L, Lin X, Segil N, Chen P. Expression of Islet1 marks the sensory  
864 and neuronal lineages in the mammalian inner ear. *J Comp Neurol* **477**, 412-421 (2004).
- 865  
866 18. Deng M, Yang H, Xie X, Liang G, Gan L. Comparative expression analysis of POU4F1, POU4F2  
867 and ISL1 in developing mouse cochleovestibular ganglion neurons. *Gene Expr Patterns* **15**,  
868 31-37 (2014).
- 869  
870 19. Chumak T, *et al.* Overexpression of Isl1 under the Pax2 Promoter, Leads to Impaired Sound  
871 Processing and Increased Inhibition in the Inferior Colliculus. *Int J Mol Sci* **22**, (2021).
- 872  
873 20. Petitpre C, *et al.* Neuronal heterogeneity and stereotyped connectivity in the auditory  
874 afferent system. *Nature communications* **9**, 3691 (2018).
- 875  
876 21. Li HJ, Kapoor A, Giel-Moloney M, Rindi G, Leiter AB. Notch signaling differentially regulates  
877 the cell fate of early endocrine precursor cells and their maturing descendants in the mouse  
878 pancreas and intestine. *Dev Biol* **371**, 156-169 (2012).
- 879  
880 22. Sun Y, Dykes IM, Liang X, Eng SR, Evans SM, Turner EE. A central role for Islet1 in sensory  
881 neuron development linking sensory and spinal gene regulatory programs. *Nat Neurosci* **11**,  
882 1283-1293 (2008).
- 883  
884 23. Jahan I, Pan N, Kersigo J, Fritzsich B. Neurod1 suppresses hair cell differentiation in ear  
885 ganglia and regulates hair cell subtype development in the cochlea. *PLoS One* **5**, e11661  
886 (2010).
- 887  
888 24. Li C, *et al.* Comprehensive transcriptome analysis of cochlear spiral ganglion neurons at  
889 multiple ages. *Elife* **9**, (2020).
- 890  
891 25. Stoeckli ET. Understanding axon guidance: are we nearly there yet? *Development* **145**,  
892 (2018).
- 893  
894 26. Fritzsich B, Kersigo J, Yang T, Jahan I, Pan N. Neurotrophic Factor Function During Ear  
895 Development: Expression Changes Define Critical Phases for Neuronal Viability. In: *The*  
896 *Primary Auditory Neurons of the Mammalian Cochlea* (eds Dabdoub A, Fritzsich B, Popper  
897 AN, Fay RR). Springer New York (2016).
- 898  
899 27. Dennis DJ, Han S, Schuurmans C. bHLH transcription factors in neural development, disease,  
900 and reprogramming. *Brain Res* **1705**, 48-65 (2019).
- 901  
902 28. Yang T, Kersigo J, Wu S, Fritzsich B, Bassuk AG. Prickle1 regulates neurite outgrowth of apical  
903 spiral ganglion neurons but not hair cell polarity in the murine cochlea. *PLoS One* **12**,  
904 e0183773 (2017).
- 905

- 906 29. Bok J, Zenczak C, Hwang CH, Wu DK. Auditory ganglion source of Sonic hedgehog regulates  
907 timing of cell cycle exit and differentiation of mammalian cochlear hair cells. *Proc Natl Acad*  
908 *Sci U S A* **110**, 13869-13874 (2013).
- 909  
910 30. Shrestha BR, Chia C, Wu L, Kujawa SG, Liberman MC, Goodrich LV. Sensory Neuron Diversity  
911 in the Inner Ear Is Shaped by Activity. *Cell* **174**, 1229-1246 e1217 (2018).
- 912  
913 31. Pauley S, Wright TJ, Pirvola U, Ornitz D, Beisel K, Fritzscht B. Expression and function of FGF10  
914 in mammalian inner ear development. *Dev Dyn* **227**, 203-215 (2003).
- 915  
916 32. Yu Y, *et al.* Sensorineural Hearing Loss and Mitochondrial Apoptosis of Cochlear Spiral  
917 Ganglion Neurons in Fibroblast Growth Factor 13 Knockout Mice. *Frontiers in Cellular*  
918 *Neuroscience* **15**, (2021).
- 919  
920 33. Fettiplace R, Hackney CM. The sensory and motor roles of auditory hair cells. *Nature reviews*  
921 *Neuroscience* **7**, 19-29 (2006).
- 922  
923 34. Neely S, Kim DO. *Cochlear models incorporating active processes*. Springer New York (2007).
- 924  
925 35. Muller M, von Hunerbein K, Hoidis S, Smolders JW. A physiological place-frequency map of  
926 the cochlea in the CBA/J mouse. *Hear Res* **202**, 63-73 (2005).
- 927  
928 36. Zhou X, Jen PH, Seburn KL, Frankel WN, Zheng QY. Auditory brainstem responses in 10  
929 inbred strains of mice. *Brain Res* **1091**, 16-26 (2006).
- 930  
931 37. Chambers AR, *et al.* Central Gain Restores Auditory Processing following Near-Complete  
932 Cochlear Denervation. *Neuron* **89**, 867-879 (2016).
- 933  
934 38. Harris JA, Rubel EW. Afferent regulation of neuron number in the cochlear nucleus: cellular  
935 and molecular analyses of a critical period. *Hear Res* **216-217**, 127-137 (2006).
- 936  
937 39. Lauer AM, Connelly CJ, Graham H, Ryugo DK. Morphological characterization of bushy cells  
938 and their inputs in the laboratory mouse (*Mus musculus*) anteroventral cochlear nucleus.  
939 *PLoS One* **8**, e73308 (2013).
- 940  
941 40. Karmakar K, *et al.* Hox2 Genes Are Required for Tonotopic Map Precision and Sound  
942 Discrimination in the Mouse Auditory Brainstem. *Cell Rep* **18**, 185-197 (2017).
- 943  
944 41. Fujiyama T, *et al.* Inhibitory and excitatory subtypes of cochlear nucleus neurons are defined  
945 by distinct bHLH transcription factors, Ptf1a and Atoh1. *Development* **136**, 2049-2058  
946 (2009).
- 947  
948 42. Gruters KG, Groh JM. Sounds and beyond: multisensory and other non-auditory signals in  
949 the inferior colliculus. *Front Neural Circuits* **6**, 96 (2012).

- 950  
951 43. Yeomans JS, Frankland PW. The acoustic startle reflex: neurons and connections. *Brain*  
952 *Research Reviews* **21**, 301-314 (1995).
- 953  
954 44. Koch M. The neurobiology of startle. *Progress in neurobiology* **59**, 107-128 (1999).
- 955  
956 45. Lee Y, Lopez DE, Meloni EG, Davis M. A primary acoustic startle pathway: obligatory role of  
957 cochlear root neurons and the nucleus reticularis pontis caudalis. *J Neurosci* **16**, 3775-3789  
958 (1996).
- 959  
960 46. Swerdlow NR, Geyer MA, Braff DL. Neural circuit regulation of prepulse inhibition of startle  
961 in the rat: current knowledge and future challenges. *Psychopharmacology* **156**, 194-215  
962 (2001).
- 963  
964 47. Fitch RH, Threlkeld SW, McClure MM, Peiffer AM. Use of a modified prepulse inhibition  
965 paradigm to assess complex auditory discrimination in rodents. *Brain research bulletin* **76**, 1-  
966 7 (2008).
- 967  
968 48. Hickox AE, Liberman MC. Is noise-induced cochlear neuropathy key to the generation of  
969 hyperacusis or tinnitus? *J Neurophysiol* **111**, 552-564 (2014).
- 970  
971 49. Pfaff SL, Mendelsohn M, Stewart CL, Edlund T, Jessell TM. Requirement for LIM homeobox  
972 gene *Isl1* in motor neuron generation reveals a motor neuron-dependent step in  
973 interneuron differentiation. *Cell* **84**, 309-320 (1996).
- 974  
975 50. Yang L, *et al.* *Isl1*Cre reveals a common Bmp pathway in heart and limb development.  
976 *Development* **133**, 1575-1585 (2006).
- 977  
978 51. Huber K, Narasimhan P, Shtukmaster S, Pfeifer D, Evans SM, Sun Y. The LIM-Homeodomain  
979 transcription factor *Isl1* is required for the development of sympathetic neurons and  
980 adrenal chromaffin cells. *Dev Biol* **380**, 286-298 (2013).
- 981  
982 52. Ahlgren U, Pfaff SL, Jessell TM, Edlund T, Edlund H. Independent requirement for *ISL1* in  
983 formation of pancreatic mesenchyme and islet cells. *Nature* **385**, 257-260 (1997).
- 984  
985 53. Cai CL, *et al.* *Isl1* identifies a cardiac progenitor population that proliferates prior to  
986 differentiation and contributes a majority of cells to the heart. *Dev Cell* **5**, 877-889 (2003).
- 987  
988 54. Liang X, *et al.* *Isl1* is required for multiple aspects of motor neuron development. *Molecular*  
989 *and cellular neurosciences* **47**, 215-222 (2011).
- 990  
991 55. Kania A, Jessell TM. Topographic motor projections in the limb imposed by LIM  
992 homeodomain protein regulation of ephrin-A:EphA interactions. *Neuron* **38**, 581-596 (2003).
- 993

- 994 56. Yamashita T, *et al.* High-resolution transcriptional dissection of in vivo Atoh1-mediated hair  
995 cell conversion in mature cochleae identifies Isl1 as a co-reprogramming factor. *PLoS Genet*  
996 **14**, e1007552 (2018).
- 997  
998 57. Chumak T, *et al.* Deterioration of the Medial Olivocochlear Efferent System Accelerates Age-  
999 Related Hearing Loss in Pax2-Isl1 Transgenic Mice. *Mol Neurobiol* **53**, 2368-2383 (2016).
- 1000  
1001 58. Bohuslavova R, *et al.* Pax2-Isl1 Transgenic Mice Are Hyperactive and Have Altered  
1002 Cerebellar Foliation. *Mol Neurobiol* **54**, 1352-1368 (2017).
- 1003  
1004 59. Huang M, Kantardzhieva A, Scheffer D, Liberman MC, Chen ZY. Hair cell overexpression of  
1005 Islet1 reduces age-related and noise-induced hearing loss. *J Neurosci* **33**, 15086-15094  
1006 (2013).
- 1007  
1008 60. Morris JK, *et al.* A disorganized innervation of the inner ear persists in the absence of ErbB2.  
1009 *Brain Res* **1091**, 186-199 (2006).
- 1010  
1011 61. Mao Y, Reiprich S, Wegner M, Fritzscht B. Targeted deletion of Sox10 by Wnt1-cre defects  
1012 neuronal migration and projection in the mouse inner ear. *PLoS One* **9**, e94580 (2014).
- 1013  
1014 62. Geyer MA, McIlwain KL, Paylor R. Mouse genetic models for prepulse inhibition: an early  
1015 review. *Mol Psychiatry* **7**, 1039-1053 (2002).
- 1016  
1017 63. LeMasurier M, Gillespie PG. Hair-cell mechanotransduction and cochlear amplification.  
1018 *Neuron* **48**, 403-415 (2005).
- 1019  
1020 64. Dallos P, *et al.* Prestin-based outer hair cell motility is necessary for mammalian cochlear  
1021 amplification. *Neuron* **58**, 333-339 (2008).
- 1022  
1023 65. Herranen A, *et al.* Deficiency of the ER-stress-regulator MANF triggers progressive outer hair  
1024 cell death and hearing loss. *Cell death & disease* **11**, 100 (2020).
- 1025  
1026 66. Liberman LD, Liberman MC. Cochlear Efferent Innervation Is Sparse in Humans and  
1027 Decreases with Age. *J Neurosci* **39**, 9560-9569 (2019).
- 1028  
1029 67. Hafidi A. Peripherin-like immunoreactivity in type II spiral ganglion cell body and projections.  
1030 *Brain Res* **805**, 181-190 (1998).
- 1031  
1032 68. Elliott KL, *et al.* Developmental Changes in Peripherin-eGFP Expression in Spiral Ganglion  
1033 Neurons. *Front Cell Neurosci* **15**, 678113 (2021).
- 1034  
1035 69. Zhang KD, Coate TM. Recent advances in the development and function of type II spiral  
1036 ganglion neurons in the mammalian inner ear. *Seminars in cell & developmental biology* **65**,  
1037 80-87 (2017).

1038  
1039 70. Froud KE, *et al.* Type II spiral ganglion afferent neurons drive medial olivocochlear reflex  
1040 suppression of the cochlear amplifier. *Nature communications* **6**, 7115 (2015).

1041  
1042 71. Maison S, Liberman LD, Liberman MC. Type II Cochlear Ganglion Neurons Do Not Drive the  
1043 Olivocochlear Reflex: Re-Examination of the Cochlear Phenotype in Peripherin Knock-Out  
1044 Mice. *eNeuro* **3**, (2016).

1045  
1046 72. Matei V, *et al.* Smaller inner ear sensory epithelia in Neurog 1 null mice are related to earlier  
1047 hair cell cycle exit. *Dev Dyn* **234**, 633-650 (2005).

1048  
1049 73. Pauley S, Lai E, Fritzscht B. Foxg1 is required for morphogenesis and histogenesis of the  
1050 mammalian inner ear. *Dev Dyn* **235**, 2470-2482 (2006).

1051  
1052 74. Nichols DH, Pauley S, Jahan I, Beisel KW, Millen KJ, Fritzscht B. Lmx1a is required for  
1053 segregation of sensory epithelia and normal ear histogenesis and morphogenesis. *Cell Tissue*  
1054 *Res* **334**, 339-358 (2008).

1055  
1056 75. Nichols DH, *et al.* Interaction with ectopic cochlear crista sensory epithelium disrupts basal  
1057 cochlear sensory epithelium development in Lmx1a mutant mice. *Cell Tissue Res* **380**, 435-  
1058 448 (2020).

1059  
1060 76. Pavlinkova G. Molecular Aspects of the Development and Function of Auditory Neurons. *Int J*  
1061 *Mol Sci* **22**, (2020).

1062  
1063 77. Zine A, Messat Y, Fritzscht B. A human induced pluripotent stem cell-based modular platform  
1064 to challenge sensorineural hearing loss. *Stem Cells*, (2021).

1065  
1066 78. Hobert O, Westphal H. Functions of LIM-homeobox genes. *Trends Genet* **16**, 75-83 (2000).

1067  
1068 79. Mamanova L, Miao Z, Jinat A, Ellis P, Shirley L, Teichmann SA. High-throughput full-length  
1069 single-cell RNA-seq automation. *Nat Protoc* **16**, 2886-2915 (2021).

1070  
1071 80. Dobin A, *et al.* STAR: ultrafast universal RNA-seq aligner. *Bioinformatics* **29**, 15-21 (2013).

1072  
1073 81. Martin M. Cutadapt removes adapter sequences from high-throughput sequencing reads.  
1074 *2011* **17**, 3 (2011).

1075  
1076 82. Bolger AM, Lohse M, Usadel B. Trimmomatic: a flexible trimmer for Illumina sequence data.  
1077 *Bioinformatics* **30**, 2114-2120 (2014).

1078  
1079 83. Kopylova E, Noe L, Touzet H. SortMeRNA: fast and accurate filtering of ribosomal RNAs in  
1080 metatranscriptomic data. *Bioinformatics* **28**, 3211-3217 (2012).

1081  
1082 84. Love MI, Huber W, Anders S. Moderated estimation of fold change and dispersion for RNA-  
1083 seq data with DESeq2. *Genome Biol* **15**, 550 (2014).

1084  
1085 85. Boyle EI, *et al.* GO::TermFinder--open source software for accessing Gene Ontology  
1086 information and finding significantly enriched Gene Ontology terms associated with a list of  
1087 genes. *Bioinformatics* **20**, 3710-3715 (2004).

1088  
1089 86. Raudvere U, *et al.* g:Profiler: a web server for functional enrichment analysis and  
1090 conversions of gene lists (2019 update). *Nucleic acids research* **47**, W191-W198 (2019).

1091  
1092 87. Shannon P, *et al.* Cytoscape: a software environment for integrated models of biomolecular  
1093 interaction networks. *Genome Res* **13**, 2498-2504 (2003).

1094  
1095 88. Merico D, Isserlin R, Stueker O, Emili A, Bader GD. Enrichment map: a network-based  
1096 method for gene-set enrichment visualization and interpretation. *PLoS One* **5**, e13984  
1097 (2010).

1098  
1099 89. Fritzscht B, Duncan JS, Kersigo J, Gray B, Elliott KL. Neuroanatomical Tracing Techniques in  
1100 the Ear: History, State of the Art, and Future Developments. In: *B. Sokolowski, Ed: Auditory  
1101 and Vestibular Research: Methods and Protocols*). Springer Science+Business Media New  
1102 York (2016).

1103  
1104 90. Simmons D, Duncan J, de Caprona DC, Fritzscht B. Development of the inner ear efferent  
1105 system. In: *Auditory and vestibular efferents*). Springer (2011).

1106  
1107 91. Bures Z, Grécová J, Popelár J, Syka J. Noise exposure during early development impairs the  
1108 processing of sound intensity in adult rats. *The European journal of neuroscience* **32**, 155-164  
1109 (2010).

1110  
1111
